RESEARCH ARTICLE

# Overweight as a Prognostic Factor for Triple-Negative Breast Cancers in Chinese Women

Shuang Hao<sup>1,2☯‡</sup>, Yin Liu<sup>1,2☯‡</sup>, Ke-Da Yu<sup>1,2\*</sup>, Sheng Chen<sup>1,2</sup>, Wen-Tao Yang<sup>2,3</sup>, Zhi-Min Shao<sup>1,2,4,5\*</sup>

**1** Department of Breast Surgery, Fudan University Shanghai Cancer Center, Shanghai, China, **2** Department of Oncology, Shanghai Medical College, Fudan University, Shanghai, China, **3** Department of Pathology, Fudan University Shanghai Cancer Center, Shanghai, China, **4** Institutes of Biomedical Science, Fudan University, Shanghai, China, **5** Key Laboratory of Breast Cancer in Shanghai, Department of Breast Surgery, Fudan University Shanghai Cancer Center, Shanghai, China

☯ These authors contributed equally to this work.

‡ These authors are co-first authors on this work

\* [zhimingshao@yahoo.com](mailto:zhimingshao@yahoo.com) (Z-MS); [yukd@shca.org.cn](mailto:yukd@shca.org.cn) (K-DY)

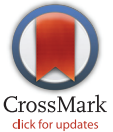

OPEN ACCESS

**Citation:** Hao S, Liu Y, Yu K-D, Chen S, Yang W-T, Shao Z-M (2015) Overweight as a Prognostic Factor for Triple-Negative Breast Cancers in Chinese Women. PLoS ONE 10(6): e0129741. doi:10.1371/journal.pone.0129741

**Editor:** Ming Tan, University of South Alabama, UNITED STATES

**Received:** February 22, 2015

**Accepted:** May 12, 2015

**Published:** June 24, 2015

**Copyright:** © 2015 Hao et al. This is an open access article distributed under the terms of the [Creative Commons Attribution License](https://creativecommons.org/licenses/by/4.0/), which permits unrestricted use, distribution, and reproduction in any medium, provided the original author and source are credited.

**Data Availability Statement:** All relevant data is within the paper and supporting information files.

**Funding:** This study was supported by grants from the Shanghai Committee of Science and Technology Fund (12DZ2260100).

**Competing Interests:** The authors have declared that no competing interests exist.

## Abstract

### Purpose

Obesity is associated with poorer outcomes in patients with hormone receptor-positive breast cancers, but this association is not well established for women with triple-negative breast cancers (TNBC). Here, we investigated the prognostic effects of body mass index (BMI) on clinical outcomes in patients with TNBC.

### Methods

We identified 1106 patients with TNBC who met the inclusion criteria and were treated between January 2002 and June 2012. Clinical and biological features were collected to evaluate the relation between BMI and breast cancer-specific survival (BCSS) and overall survival (OS) after controlling for other clinically significant variables.

### Results

Of 1106 patients, 656 (59.3%) were normal weight (BMI  $\leq 24$ ) and 450 patients (40.7%) were overweight (BMI  $> 24$ ). Median follow-up time was 44.8 months. Breast cancer specific death was observed in 140 patients. After adjusting for clinicopathologic risk factors, overweight was associated with OS (hazard ratio [HR]: 1.46, 95% confidence interval [CI]: 1.04–2.06,  $P = 0.028$ ) but not BCSS (HR: 1.34, 95% CI: 0.90–2.01,  $P = 0.15$ ) in all the patients with TNBC. When stratified with menopausal status, overweight was associated with BCSS and OS (HR: 2.27, 95% CI: 1.11–4.63,  $P = 0.024$  and HR: 2.16, 95% CI: 1.21–3.87,  $P = 0.010$ , respectively) in premenopausal women. BMI was not associated with BCSS or OS in postmenopausal women.

### Conclusions

Overweight is an independent prognostic factor of OS in all women with TNBC, and menopause status may be a mitigating factor. Among premenopausal women, overweight

women are at a greater risk of poor prognosis than normal weight women. If validated, these findings should be considered in developing preventive programs.

## Introduction

Gene expression profiles have reshaped our understanding of breast cancer by defining and characterizing four main subtypes: human epidermal growth factor receptor-2 (HER2)-enriched, basal-like, luminal A, and luminal B[1]. Basal-like breast cancer has a unique clinical-pathological presentation, prognosis, and response to therapy, with poorer prognosis than luminal tumors, but can be difficult to identify in clinic. About three quarters of triple-negative breast cancers (TNBCs)—i.e., estrogen receptor (ER)<sup>-</sup>, progesterone receptor (PR)<sup>-</sup> and not overexpressing HER2[2]—express basal markers, so the triple-negative type is frequently taken as a surrogate marker of basal-like breast cancer.

For 30 years, accumulating evidence suggests that obese women have poorer prognoses than lean ones after breast cancer treatment[3–5]. In an observational prospective study of about 350,000 US women, higher BMI was very significantly associated with increasing risk of dying from breast cancer[6]. However, very few studies, all with small samples, have investigated the influence of body mass index (BMI) in TNBC outcomes[7]. Consequently, we examined the impact of overweight on breast cancer-specific survival (BCSS) and overall survival (OS) in Chinese patients treated for TNBC between January 2002 and June 2012.

## Patients and Methods

### Study population

From the database of Fudan University Shanghai Cancer Center, we identified 1,106 women with TNBC with complete follow-up data who received treatment for early-stage breast cancer. According to the inclusion criteria, all cases were confirmed as females with TNBC but no distant metastasis at the initial diagnosis. All patients received a complete physical examination, bilateral mammography, chest radiography, ECG and ultrasonography of the breast, axillary fossa, abdomen and pelvis. All patients at risk for relapse received adjuvant chemotherapy, using different regimens according to the standards used at the time of surgery, followed by radiotherapy (if required). Exclusion criteria included ER or PR positivity, HER2 overexpression or amplification, unknown date of surgery, absence of date of last follow-up, additional malignancy and male sex. Information was available for all patients' age and menopausal status at diagnosis, tumor size, number of lymph nodes removed, number of positive lymph nodes, histological type, histological grade and treatment regimen. Data on height and weight at diagnosis to compute BMI were also available for these patients. We identified 24 kg/m<sup>2</sup> as the cut-off point according to the Working Group on Obesity in China guideline[8].

Information on date and cause of death came from linking to Center of Disease Control records, using the unique personal identification number issued to every Chinese citizen. Causes of death were obtained from death certificates and were classified as either death as a result of breast cancer or death from other causes. In this study, we identified BCSS and OS as the time-to-event end points. BCSS was defined as time from surgery to death as a result of breast cancer. OS was calculated from the date of surgery to the date of death irrespective of any cause or last follow-up.

The study was conducted according to the principles expressed in the Declaration of Helsinki and approved by the institutional review board of Fudan University Shanghai Cancer Center. All the patients enrolled in this study signed the informed consent voluntarily.

## Histopathology and immunohistochemistry

ER, PR and HER2 status were determined on representative paraffin sections of each tumor, using immunohistochemical (IHC) staining, performed after the patient underwent surgery. ER and PR antibodies were purchased from Dako (clones ER 1D5 1:35 and PR 636 1:50) and were evaluated by an avidin–biotin–peroxidase complex (ABC) assay as described by Shimada et al[9]. ER and PR were considered positive in breast cancer cells if the positive nuclei number was  $\geq 10\%$ . After July 2010, tumors in which  $\geq 1\%$  of tumor cells staining for ER or PgR of any intensity were considered positive[10]. Cytoplasmic staining was ignored[11]. Overexpression of HER2 protein was evaluated using a monoclonal antibody (Dako, Clone PN2A 1:400) and a peroxidase-antiperoxidase (PAP) technique. Positive HER2 was defined as a complete membrane staining in  $>10\%$  of tumor cells[12], using a qualitative HercepTest scale of 0–3+, in which scores 0–1 were negative, and 3 was positive[13]. Fluorescence *in situ* hybridization tests were used when the IHC results were ambiguous (i.e., 2+), or for patients who could not be defined as HER2<sup>+</sup>. The pathological and IHC outcomes were diagnosed under an Olympus light microscope with  $\times 10$  and  $\times 40$  magnifications by two independent pathologists in the Department of Pathology, Fudan University Shanghai Cancer Center.

## Statistical analysis

Associations between BMI and other characteristics were analyzed using the chi-square test. For the assessment of the influence of BMI on survival outcome, we adjusted for age at diagnosis, menopausal status, tumor size, nodal status, grade and systemic adjuvant therapy by multivariate Cox proportional hazards models. The assumption of Cox's proportional hazards model was assessed by the analysis of Schoenfeld residuals [14]. All *P* values were two sided. Statistical analyses were performed using SPSS Statistics 19.0 (IBM SPSS Statistics 19).  $P < 0.05$  was considered significant.

## Results

### Characteristics of patients

Of the 1106 patients, 656 (59.3%) were normal weight ( $BMI \leq 24$ ), and 450 patients (40.7%) were over weight ( $BMI > 24$ ). Median follow-up time was 44.8 months. Breast cancer specific death was observed in 140 patients. The normal weight group's median age was 50 years (range: 23–85 years). The overweight group's median age was 53 years (range: 30–86 years). The overweight group had a significantly higher proportion of larger tumors ( $> 2\text{cm}$ ;  $P < 0.001$ ), included more postmenopausal women ( $P < 0.001$ ), and less patients received chemotherapy than in the normal weight group ( $P = 0.009$ ; Table 1).

BMI was not associated with tumor grade and lymph node status (Table 1).

### Overweight and survival

Univariate analysis using the Kaplan-Meier method indicated that overweight was significantly ( $P = 0.008$ ) associated with poorer BCSS and OS in TNBC patients (Fig 1A and 1B). After stratified by menopausal status, overweight indicated poorer BCSS ( $P = 0.004$ ; Fig 2A) and OS ( $P = 0.013$ ; Fig 2B) in premenopausal women, but not postmenopausal ones ( $P = 0.571$  and  $P = 0.347$ ; Fig 3A and 3B).

**Table 1. Baseline characteristics of patients.**

| Characteristics <sup>a</sup> | Total<br>N (%) | BMI ≤24<br>N (%) | BMI >24<br>N (%) | P      |
|------------------------------|----------------|------------------|------------------|--------|
| Tumor size (cm)              |                |                  |                  |        |
| ≤2.0                         | 456 (41.9%)    | 294 (45.9%)      | 162 (36.2%)      | <0.001 |
| >2.0                         | 632 (58.1%)    | 346(54.1%)       | 286(63.8%)       |        |
| Tumor grade                  |                |                  |                  |        |
| I–II                         | 462 (43.4%)    | 280 (44.9%)      | 182 (41.7%)      | 0.256  |
| III                          | 602 (56.6%)    | 344 (55.1%)      | 258 (58.3%)      |        |
| LN status                    |                |                  |                  |        |
| -                            | 652 (59.0%)    | 380 (57.9%)      | 272 (60.4%)      | 0.403  |
| +                            | 454 (41.0%)    | 276 (42.1%)      | 178 (39.6%)      |        |
| Menopausal status            |                |                  |                  |        |
| Pre-                         | 568 (51.4%)    | 370 (56.4%)      | 198 (44.0%)      | <0.001 |
| Post-                        | 538 (48.6%)    | 286 (43.6%)      | 252 (56.0%)      |        |
| Chemotherapy                 |                |                  |                  |        |
| -                            | 64 (5.8%)      | 28 (4.3%)        | 36 (8.0%)        | 0.009  |
| +                            | 1042 (94.2%)   | 628 (95.7%)      | 414 (92.0%)      |        |

BMI: body mass index; LN: lymph node.

<sup>a</sup>The numbers of tumor size, tumor grade and LN status were less than the total number of subjects because some clinical data were missing.

doi:10.1371/journal.pone.0129741.t001

In multivariable analysis, overweight was significantly with OS(hazard ratio [HR]:1.46, 95% confidence interval [CI]: 1.04–2.06,  $P = 0.028$ ) but not BCSS (HR: 1.34, 95% CI: 0.90–2.01,  $P = 0.150$ )after adjustment for clinicopathologic risk factors(Table 2). In stratification analysis, overweight was an independent prognostic factor for BCSS (HR:2.27, 95% CI: 1.11–4.63,  $P = 0.024$ ; Table 3) and OS (HR: 2.16, 95% CI: 1.21–3.87,  $P = 0.010$ ; Table 4). Among postmenopausal women, BMI did not predict for BCSS (HR: 0.96, 95% CI: 0.58–1.58,  $P = 0.861$ ; Table 3) or OS (HR: 1.07, 95% CI: 0.70–1.64,  $P = 0.754$ ;Table 4). By using the Schoenfeld residuals, there was no evidence that the effect of BMI on survival outcome changed with date of diagnosis ( $P = 0.928$ ) in the test of proportional hazards assumption.

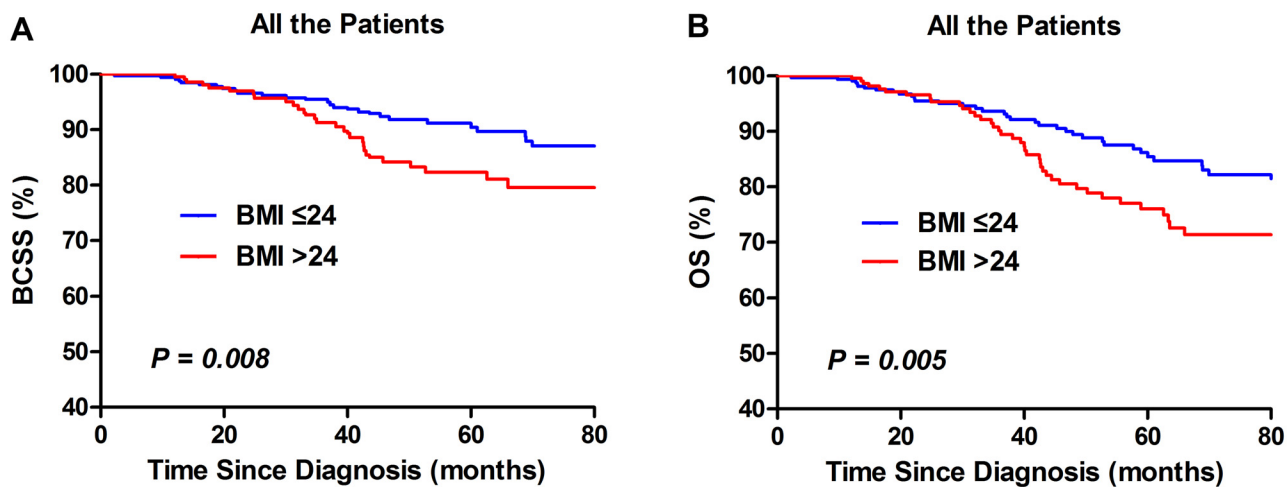

**Fig 1. Kaplan–Meier curves of BCSS (A) and OS (B) by BMI groups in all TNBC patients.**

doi:10.1371/journal.pone.0129741.g001

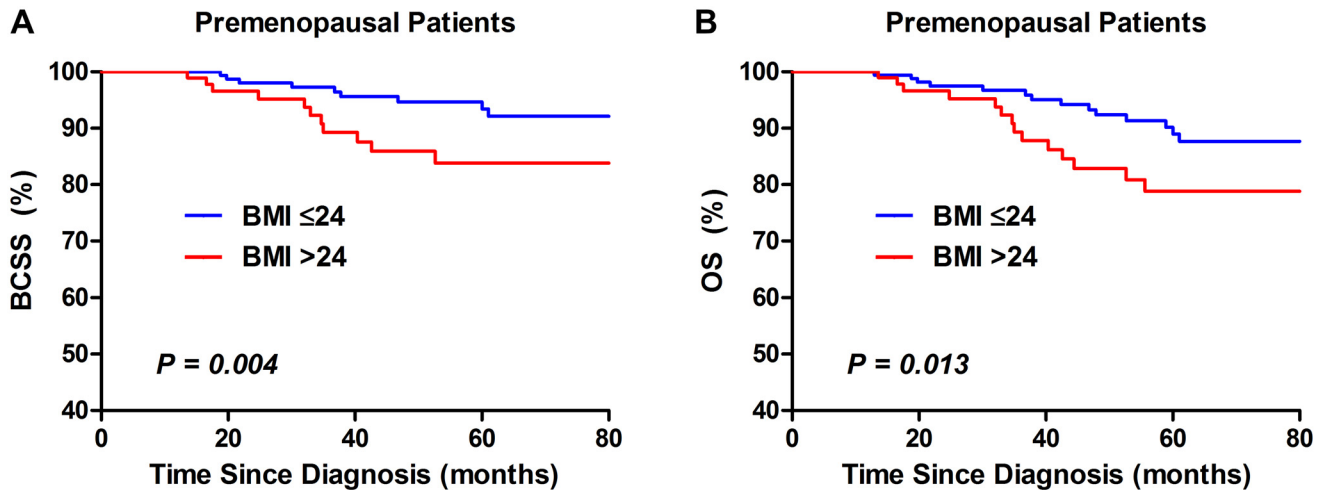

Fig 2. Kaplan–Meier curves of BCSS (A) and OS (B) by BMI groups in premenopausal TNBC patients.

doi:10.1371/journal.pone.0129741.g002

### Discussion

Patients with TNBC tend to have worse clinical outcomes partly as a result of lacking a therapeutic target. Consequently, establishing a relation between modifiable factors that may portend an adverse outcome potentially may be beneficial to these patients[15]. This study confirms reports that overweight patients often have larger tumors at diagnosis[6, 16], and shows BMI >24 to independently predict BCSS in premenopausal TNBC patients, but not in postmenopausal ones after adjusting for these known prognostic factors. Overweight also had a negative influence on OS, especially in premenopausal patients.

Although many studies with sufficiently large cohorts have found associations between obesity and patient survival[17–20], very few studies have focused on BMI’s prognostic role in TNBC, the results of which vary considerably[7, 15, 21–24]. The results of our study are consistent with several reports in the literature, which suggest that increasing BMI was associated with inferior survival in TNBC. In a single center study of 818 patients with TNBC, OB was associated with worse DFS and OS for premenopausal patients with TNBC at a median follow-

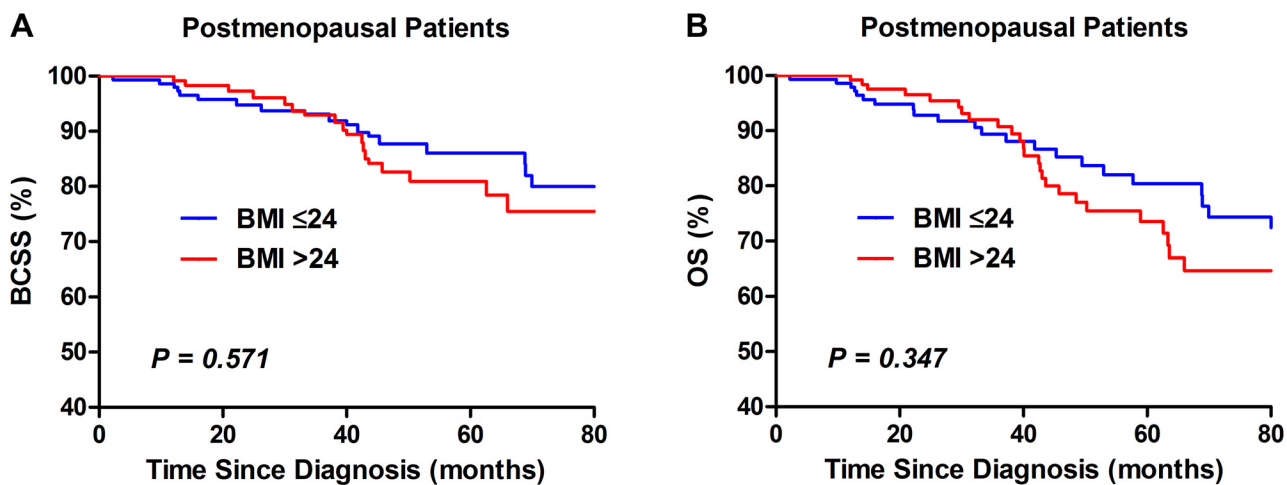

Fig 3. Kaplan–Meier curves of BCSS (A) and OS (B) by BMI groups in postmenopausal TNBC patients.

doi:10.1371/journal.pone.0129741.g003

**Table 2. Multivariate survival analysis in TNBC patients.**

| Menopausal status     | BCSS                  |                 |            | OS                    |                 |            |
|-----------------------|-----------------------|-----------------|------------|-----------------------|-----------------|------------|
|                       | <i>P</i> <sup>a</sup> | HR <sup>a</sup> | 95% CI     | <i>P</i> <sup>a</sup> | HR <sup>a</sup> | 95% CI     |
| <b>Total</b>          |                       |                 |            |                       |                 |            |
| Tumor size            | <0.001                |                 |            | <0.001                |                 |            |
| T1                    |                       | 1.00            |            |                       | 1.00            |            |
| T2                    |                       | 1.03            | 0.66–1.63  |                       | 1.05            | 0.72–1.52  |
| T3                    |                       | 7.01            | 3.94–12.46 |                       | 5.50            | 3.29–9.20  |
| Nodal status          | <0.001                | 5.54            | 3.36–9.14  | <0.001                | 3.53            | 2.44–5.11  |
| BMI                   | 0.150                 | 1.34            | 0.90–2.01  | 0.028                 | 1.46            | 1.04–2.06  |
| Chemotherapy          | 0.028                 | 0.50            | 0.27–0.93  | NS                    |                 |            |
| Grade                 | NS                    |                 |            | NS                    |                 |            |
| <b>Premenopausal</b>  |                       |                 |            |                       |                 |            |
| Tumor size            | <0.001                |                 |            | <0.001                |                 |            |
| T1                    |                       | 1.00            |            |                       | 1.00            |            |
| T2                    |                       | 1.45            | 0.63–3.34  |                       | 1.11            | 0.59–2.07  |
| T3                    |                       | 7.48            | 2.81–19.92 |                       | 4.78            | 2.11–10.80 |
| Nodal status          | <0.001                | 12.35           | 4.30–35.42 | <0.001                | 5.77            | 2.99–11.14 |
| BMI                   | 0.024                 | 2.27            | 1.11–4.63  | 0.010                 | 2.16            | 1.21–3.87  |
| Chemotherapy          | NS                    |                 |            | NS                    |                 |            |
| Grade                 | 0.039                 | 0.49            | 0.25–0.96  | NS                    |                 |            |
| <b>Postmenopausal</b> |                       |                 |            |                       |                 |            |
| Tumor size            | <0.001                |                 |            | <0.001                |                 |            |
| T1                    |                       | 1.00            |            |                       | 1.00            |            |
| T2                    |                       | 0.85            | 0.49–1.49  |                       | 1.02            | 0.64–1.62  |
| T3                    |                       | 7.29            | 3.37–15.78 |                       | 7.87            | 3.89–15.90 |
| Nodal status          | <0.001                | 3.95            | 2.19–7.15  | <0.001                | 2.59            | 1.63–4.11  |
| BMI                   | 0.861                 | 0.96            | 0.58–1.58  | 0.754                 | 1.07            | 0.70–1.64  |
| Chemotherapy          | NS                    |                 |            | NS                    |                 |            |
| Grade                 | NS                    |                 |            | NS                    |                 |            |

BMI: body mass index; CI: confidence interval; HR: hazard ratio.

<sup>a</sup>Adjusted for age at diagnosis, menopausal status, tumor size, nodal status, grade and systemic adjuvant therapy

doi:10.1371/journal.pone.0129741.t002

up of 29 months[22]. Similar findings were observed in a pooled analysis of 8,872 patients, which had a median follow-up of 42.7 months. Mean DFS and OS were shorter in obese and very obese compared with normal weight patients in TNBC[25]. Pathological complete response rate was higher in normal weight patients compared with overweight groups. The impact of BMI on breast cancer outcome has also been investigated by Pajares et al. in 5,683 operable breast cancer patients enrolled in four randomized clinical trials. In this pooled analysis, severely obese patients treated with anthracyclines and taxanes present a worse prognosis regarding DFS, BCSS and OS than patients with BMI < 25 across subtypes including TNBC[26].

Tait et al. [22] suggested that BMI did not affect survival for patients with TNBC. Ade-muyiwa et al. found no significant relationship between obesity and RFS or OS in patients with TNBC after controlling for clinically significant factors[15], possibly because TNBC patients tend to receive cytotoxic chemotherapy which may neutralize potential detrimental effects of a higher BMI. Both of these studies included a smaller sample size compared to our study. To

**Table 3. Univariate and multivariate BCSS analysis of BMI in TNBC patients according to menopausal status.**

| Menopausal status/BMI   | Patients <i>N</i> | Events <i>N</i> | Univariate <i>P</i> | Multivariate <i>P</i> <sup>a</sup> | HR <sup>a</sup> | 95% CI    |
|-------------------------|-------------------|-----------------|---------------------|------------------------------------|-----------------|-----------|
| Total                   | 1106              | 106             | 0.008               | 0.150                              | 1.34            | 0.90–2.01 |
| BMI ≤24(normal weight)  | 656               | 50              |                     |                                    |                 |           |
| BMI >24(overweight)     | 450               | 56              |                     |                                    |                 |           |
| Premenopausal patients  |                   |                 |                     |                                    |                 |           |
| Total                   | 568               | 40              | 0.004               | 0.024                              | 2.27            | 1.11–4.63 |
| BMI ≤24(normal weight)  | 370               | 18              |                     |                                    |                 |           |
| BMI >24(overweight)     | 198               | 22              |                     |                                    |                 |           |
| Postmenopausal patients |                   |                 |                     |                                    |                 |           |
| Total                   | 538               | 66              | 0.571               | 0.861                              | 0.96            | 0.58–1.58 |
| BMI ≤24(normal weight)  | 286               | 32              |                     |                                    |                 |           |
| BMI >24(overweight)     | 252               | 34              |                     |                                    |                 |           |

BCSS: breast cancer-specific survival; BMI: body mass index; CI: confidence interval; HR: hazard ratio. NS: no significance

<sup>a</sup>Adjusted for age at diagnosis, menopausal status, tumor size, nodal status, grade and systemic adjuvant therapy

doi:10.1371/journal.pone.0129741.t003

date, two largest pooled analyses supported a negative effect of BMI on survival outcomes in patients with TNBC[25, 26]. Our data provided critical additional evidence for this finding.

High BMI might influence TNBC prognosis through various mechanisms, such as obesity-associated comorbidities that interfere with optimal treatment, the effect of higher cholesterol level on tumor metastasis, or other mechanisms. High BMI might cause higher cholesterol levels and even fatty liver disease, which would affect implementation or dosing of chemotherapy. Nelson et al. demonstrated that liver X receptor activation by 27-hydroxycholesterol (27HC, a primary cholesterol metabolite) increases tumor metastasis and that these activities occur independently of ER[27]. Consequently, obesity or OW, which cause higher 27HC levels, could indicate poorer prognosis. Leptin, the adipose tissue cytokine, increases in obesity and promotes survival of cancer stem cells in vivo, consequently promoting breast cancer[28]. Moreover, Howe et al found out that saturated fatty acids, released as a consequence of obesity-associated lipolysis, induce macrophage activation via Toll-like receptor-4, thereby stimulating

**Table 4. Univariate and multivariate OS survival analysis of BMI in TNBC patients according to menopausal status.**

| Menopausal status/BMI   | Patients <i>N</i> | Events <i>N</i> | Univariate <i>P</i> | Multivariate <i>P</i> | HR   | 95% CI    |
|-------------------------|-------------------|-----------------|---------------------|-----------------------|------|-----------|
| Total                   | 1106              | 154             | 0.005               | 0.028                 | 1.46 | 1.04–2.06 |
| BMI ≤24(normal weight)  | 656               | 76              |                     |                       |      |           |
| BMI >24(overweight)     | 450               | 78              |                     |                       |      |           |
| Premenopausal patients  |                   |                 |                     |                       |      |           |
| Total                   | 568               | 58              | 0.013               | 0.010                 | 2.16 | 1.21–3.87 |
| BMI ≤24 (normal weight) | 370               | 30              |                     |                       |      |           |
| BMI >24(overweight)     | 198               | 28              |                     |                       |      |           |
| Postmenopausal patients |                   |                 |                     |                       |      |           |
| Total                   | 538               | 96              | 0.347               | 0.754                 | 1.07 | 0.70–1.64 |
| BMI ≤24 (normal weight) | 286               | 46              |                     |                       |      |           |
| BMI >24(overweight)     | 252               | 50              |                     |                       |      |           |

BCSS: breast cancer-specific survival; BMI: body mass index; CI: confidence interval; HR: hazard ratio. NS: no significance

<sup>a</sup>Adjusted for age at diagnosis, menopausal status, tumor size, nodal status, grade and systemic adjuvant therapy

doi:10.1371/journal.pone.0129741.t004

NF- $\kappa$ B signaling. This, in turn, activates transcription of pro-inflammatory factors including COX-2, IL-6, IL-1 $\beta$ , and TNF $\alpha$ [29], which promote tumor growth and progression through various mechanisms.

In the multivariate analysis, higher BMI was associated with OS rather than BCSS in the whole study population. Previous studies turned out that obesity is probably the most powerful modifiable risk factor for the incidence and prognosis of breast cancer. Obesity is well known to be a potent promoter of comorbid conditions, as cardiovascular risk factors including glucose and lipid disorders and elevated blood pressure for instance, which may reduce the patients' overall survival more significantly. When the association was evaluated based on women's menopausal status, data were significant only among pre-menopausal individuals, suggesting that distinct molecular mechanisms are involved in the onset and progression of TNBC during the women's reproductive life. Why BMI is an independent predictor in premenopausal TNBC patients but not in postmenopausal ones is unclear. TNBC is a molecularly and clinically heterogeneous disease, which may be genomically subdivided into 3 distinct tumors: those with HER2 gene amplification; basal-like tumors; and tumors without ER, PR, HER2, or basal-like features [30]. TNBC diagnosed in younger patients might differ from than in older ones.

To our knowledge, this is the first study to examine the relationships between obesity and TNBC survival outcomes in a relatively large Chinese patient cohort. There were some potential limitations in our study. Firstly, due to the relatively proportion of underweight and obese patients, classification was measured in a binary scale. This classification did not allow to clearly distinguish between women who were obese and those who were overweight. Secondly, the current study population is composed of 1106 early-stage TNBCs received surgical treatment. Meanwhile, neoadjuvant treatment is an important treatment option in TNBC patients, assessing the prognostic and predictive impact of BMI in the neoadjuvant setting is essential and warranted. Moreover, our analysis was limited to homogeneous Chinese population, the generalize ability to other ethnic groups is uncertain.

In conclusion, according to this analysis, overweight women with TNBC are at a greater risk of poor prognosis than normal weight women in premenopausal population. If validated, these findings should be taken into consideration for the development of preventive programs in TNBCs.

## Supporting Information

### S1 Data. Data set underlying the findings.

(XLSX)

### S1 Table. Summary of the similar papers and ours.

(DOCX)

## Acknowledgments

This study was supported in part by grants from the Shanghai Committee of Science and Technology Fund (12DZ2260100). The funders had no role in study design, data collection and analysis, decision to publish or manuscript preparation.

## Author Contributions

Conceived and designed the experiments: ZMS KDY. Analyzed the data: SH YL KDY. Contributed reagents/materials/analysis tools: WTY. Wrote the paper: SH YL KDY SC ZMS.



## References

- Ades F, Zardavas D, Bozovic-Spasojevic I, Pugliano L, Fumagalli D, de Azambuja E, et al. Luminal B Breast Cancer: Molecular Characterization, Clinical Management, and Future Perspectives. *Journal of clinical oncology: official journal of the American Society of Clinical Oncology*. 2014. doi: [10.1200/JCO.2013.54.1870](https://doi.org/10.1200/JCO.2013.54.1870) PMID: [25049332](https://pubmed.ncbi.nlm.nih.gov/25049332/).
- Carey LA, Perou CM, Livasy CA, Dressler LG, Cowan D, Conway K, et al. Race, breast cancer subtypes, and survival in the Carolina Breast Cancer Study. *Jama*. 2006; 295(21):2492–502. doi: [10.1001/jama.295.21.2492](https://doi.org/10.1001/jama.295.21.2492) PMID: [16757721](https://pubmed.ncbi.nlm.nih.gov/16757721/).
- Dawood S, Broglio K, Gonzalez-Angulo AM, Kau SW, Islam R, Hortobagyi GN, et al. Prognostic value of body mass index in locally advanced breast cancer. *Clinical cancer research: an official journal of the American Association for Cancer Research*. 2008; 14(6):1718–25. doi: [10.1158/1078-0432.CCR-07-1479](https://doi.org/10.1158/1078-0432.CCR-07-1479) PMID: [18347172](https://pubmed.ncbi.nlm.nih.gov/18347172/).
- Kroenke CH, Chen WY, Rosner B, Holmes MD. Weight, weight gain, and survival after breast cancer diagnosis. *Journal of clinical oncology: official journal of the American Society of Clinical Oncology*. 2005; 23(7):1370–8. doi: [10.1200/JCO.2005.01.079](https://doi.org/10.1200/JCO.2005.01.079) PMID: [15684320](https://pubmed.ncbi.nlm.nih.gov/15684320/).
- Caan BJ, Kwan ML, Hartzell G, Castillo A, Slattery ML, Sternfeld B, et al. Pre-diagnosis body mass index, post-diagnosis weight change, and prognosis among women with early stage breast cancer. *Cancer causes & control: CCC*. 2008; 19(10):1319–28. doi: [10.1007/s10552-008-9203-0](https://doi.org/10.1007/s10552-008-9203-0) PMID: [18752034](https://pubmed.ncbi.nlm.nih.gov/18752034/); PubMed Central PMCID: [PMC2925505](https://pubmed.ncbi.nlm.nih.gov/PMC2925505/).
- Ewertz M, Jensen MB, Gunnarsdottir KA, Hojris I, Jakobsen EH, Nielsen D, et al. Effect of obesity on prognosis after early-stage breast cancer. *Journal of clinical oncology: official journal of the American Society of Clinical Oncology*. 2011; 29(1):25–31. doi: [10.1200/JCO.2010.29.7614](https://doi.org/10.1200/JCO.2010.29.7614) PMID: [21115856](https://pubmed.ncbi.nlm.nih.gov/21115856/).
- Mowad R, Chu QD, Li BD, Burton GV, Ampil FL, Kim RH. Does obesity have an effect on outcomes in triple-negative breast cancer? *The Journal of surgical research*. 2013; 184(1):253–9. doi: [10.1016/j.jss.2013.05.037](https://doi.org/10.1016/j.jss.2013.05.037) PMID: [23768767](https://pubmed.ncbi.nlm.nih.gov/23768767/).
- Zhou BF, Cooperative Meta-Analysis Group of the Working Group on Obesity in C. Predictive values of body mass index and waist circumference for risk factors of certain related diseases in Chinese adults—study on optimal cut-off points of body mass index and waist circumference in Chinese adults. *Biomedical and environmental sciences: BES*. 2002; 15(1):83–96. PMID: [12046553](https://pubmed.ncbi.nlm.nih.gov/12046553/).
- Shimada A, Kimura S, Abe K, Nagasaki K, Adachi I, Yamaguchi K, et al. Immunocytochemical staining of estrogen receptor in paraffin sections of human breast cancer by use of monoclonal antibody: comparison with that in frozen sections. *Proceedings of the National Academy of Sciences of the United States of America*. 1985; 82(14):4803–7. PMID: [3860824](https://pubmed.ncbi.nlm.nih.gov/3860824/); PubMed Central PMCID: [PMC390993](https://pubmed.ncbi.nlm.nih.gov/PMC390993/).
- Hammond ME, Hayes DF, Dowsett M, Allred DC, Hagerty KL, Badve S, et al. American Society of Clinical Oncology/College Of American Pathologists guideline recommendations for immunohistochemical testing of estrogen and progesterone receptors in breast cancer. *Journal of clinical oncology: official journal of the American Society of Clinical Oncology*. 2010; 28(16):2784–95. doi: [10.1200/JCO.2009.25.6529](https://doi.org/10.1200/JCO.2009.25.6529) PMID: [20404251](https://pubmed.ncbi.nlm.nih.gov/20404251/); PubMed Central PMCID: [PMC2881855](https://pubmed.ncbi.nlm.nih.gov/PMC2881855/).
- Rody A, Diallo R, Poremba C, Speich R, Wuelfing P, Kissler S, et al. Estrogen receptor alpha and beta, progesterone receptor, pS2 and HER-2/neu expression delineate different subgroups in ductal carcinoma in situ of the breast. *Oncology reports*. 2004; 12(4):695–9. PMID: [15375487](https://pubmed.ncbi.nlm.nih.gov/15375487/).
- Gouvea AP, Milanezi F, Olson SJ, Leitao D, Schmitt FC, Gobbi H. Selecting antibodies to detect HER2 overexpression by immunohistochemistry in invasive mammary carcinomas. *Applied immunohistochemistry & molecular morphology: AIMM / official publication of the Society for Applied Immunohistochemistry*. 2006; 14(1):103–8. doi: [10.1097/01.pai.0000155794.64525.11](https://doi.org/10.1097/01.pai.0000155794.64525.11) PMID: [16540740](https://pubmed.ncbi.nlm.nih.gov/16540740/).
- Jacobs TW, Gown AM, Yaziji H, Barnes MJ, Schnitt SJ. Specificity of HercepTest in determining HER-2/neu status of breast cancers using the United States Food and Drug Administration-approved scoring system. *Journal of clinical oncology: official journal of the American Society of Clinical Oncology*. 1999; 17(7):1983–7. PMID: [10561248](https://pubmed.ncbi.nlm.nih.gov/10561248/).
- Datema FR, Moya A, Krause P, Back T, Willmes L, Langeveld T, et al. Novel head and neck cancer survival analysis approach: random survival forests versus Cox proportional hazards regression. *Head & neck*. 2012; 34(1):50–8. doi: [10.1002/hed.21698](https://doi.org/10.1002/hed.21698) PMID: [21322080](https://pubmed.ncbi.nlm.nih.gov/21322080/).
- Ademuyiwa FO, Groman A, O'Connor T, Ambrosone C, Watroba N, Edge SB. Impact of body mass index on clinical outcomes in triple-negative breast cancer. *Cancer*. 2011; 117(18):4132–40. doi: [10.1002/cncr.26019](https://doi.org/10.1002/cncr.26019) PMID: [21387276](https://pubmed.ncbi.nlm.nih.gov/21387276/).
- Majed B, Moreau T, Senouci K, Salmon RJ, Fourquet A, Asselain B. Is obesity an independent prognosis factor in woman breast cancer? *Breast cancer research and treatment*. 2008; 111(2):329–42. doi: [10.1007/s10549-007-9785-3](https://doi.org/10.1007/s10549-007-9785-3) PMID: [17939036](https://pubmed.ncbi.nlm.nih.gov/17939036/).
- Berclaz G, Li S, Price KN, Coates AS, Castiglione-Gertsch M, Rudenstam CM, et al. Body mass index as a prognostic feature in operable breast cancer: the International Breast Cancer Study Group

- experience. *Annals of oncology: official journal of the European Society for Medical Oncology / ESMO*. 2004; 15(6):875–84. PMID: [15151943](#).
18. de Azambuja E, McCaskill-Stevens W, Francis P, Quinaux E, Crown JP, Vicente M, et al. The effect of body mass index on overall and disease-free survival in node-positive breast cancer patients treated with docetaxel and doxorubicin-containing adjuvant chemotherapy: the experience of the BIG 02–98 trial. *Breast cancer research and treatment*. 2010; 119(1):145–53. doi: [10.1007/s10549-009-0512-0](#) PMID: [19731015](#).
  19. Ladoire S, Dalban C, Roche H, Spielmann M, Fumoleau P, Levy C, et al. Effect of obesity on disease-free and overall survival in node-positive breast cancer patients in a large French population: a pooled analysis of two randomised trials. *European journal of cancer*. 2014; 50(3):506–16. doi: [10.1016/j.ejca.2013.11.013](#) PMID: [24315625](#).
  20. Chen X, Lu W, Zheng W, Gu K, Chen Z, Zheng Y, et al. Obesity and weight change in relation to breast cancer survival. *Breast cancer research and treatment*. 2010; 122(3):823–33. doi: [10.1007/s10549-009-0708-3](#) PMID: [20058068](#); PubMed Central PMCID: [PMC3777404](#).
  21. Dawood S, Lei X, Litton JK, Buchholz TA, Hortobagyi GN, Gonzalez-Angulo AM. Impact of body mass index on survival outcome among women with early stage triple-negative breast cancer. *Clinical breast cancer*. 2012; 12(5):364–72. doi: [10.1016/j.clbc.2012.07.013](#) PMID: [23040004](#).
  22. Turkoz FP, Solak M, Petekkaya I, Keskin O, Kertmen N, Sarici F, et al. The prognostic impact of obesity on molecular subtypes of breast cancer in premenopausal women. *Journal of BUON: official journal of the Balkan Union of Oncology*. 2013; 18(2):335–41. PMID: [23818343](#).
  23. Pierobon M, Frankenfeld CL. Obesity as a risk factor for triple-negative breast cancers: a systematic review and meta-analysis. *Breast cancer research and treatment*. 2013; 137(1):307–14. doi: [10.1007/s10549-012-2339-3](#) PMID: [23179600](#).
  24. Tait S, Pacheco JM, Gao F, Bumb C, Ellis MJ, Ma CX. Body mass index, diabetes, and triple-negative breast cancer prognosis. *Breast cancer research and treatment*. 2014; 146(1):189–97. doi: [10.1007/s10549-014-3002-y](#) PMID: [24869799](#).
  25. Fontanella C, Lederer B, Gade S, Vanoppen M, Blohmer JU, Costa SD, et al. Impact of body mass index on neoadjuvant treatment outcome: a pooled analysis of eight prospective neoadjuvant breast cancer trials. *Breast cancer research and treatment*. 2015; 150(1):127–39. doi: [10.1007/s10549-015-3287-5](#) PMID: [25677740](#).
  26. Pajares B, Pollan M, Martin M, Mackey JR, Lluch A, Gavila J, et al. Obesity and survival in operable breast cancer patients treated with adjuvant anthracyclines and taxanes according to pathological subtypes: a pooled analysis. *Breast cancer research: BCR*. 2013; 15(6):R105. doi: [10.1186/bcr3572](#) PMID: [24192331](#); PubMed Central PMCID: [PMC3978725](#).
  27. Nelson ER, Wardell SE, Jasper JS, Park S, Suchindran S, Howe MK, et al. 27-Hydroxycholesterol links hypercholesterolemia and breast cancer pathophysiology. *Science*. 2013; 342(6162):1094–8. doi: [10.1126/science.1241908](#) PMID: [24288332](#); PubMed Central PMCID: [PMC3899689](#).
  28. Zheng Q, Banaszak L, Fracci S, Basali D, Dunlap SM, Hursting SD, et al. Leptin receptor maintains cancer stem-like properties in triple negative breast cancer cells. *Endocrine-related cancer*. 2013; 20(6):797–808. doi: [10.1530/ERC-13-0329](#) PMID: [24025407](#); PubMed Central PMCID: [PMC3843956](#).
  29. Howe LR, Subbaramaiah K, Hudis CA, Dannenberg AJ. Molecular pathways: adipose inflammation as a mediator of obesity-associated cancer. *Clinical cancer research: an official journal of the American Association for Cancer Research*. 2013; 19(22):6074–83. doi: [10.1158/1078-0432.CCR-12-2603](#) PMID: [23958744](#); PubMed Central PMCID: [PMC3891839](#).
  30. Perou CM, Sorlie T, Eisen MB, van de Rijn M, Jeffrey SS, Rees CA, et al. Molecular portraits of human breast tumours. *Nature*. 2000; 406(6797):747–52. doi: [10.1038/35021093](#) PMID: [10963602](#).
