# Supplementary material for: Overweight as a Prognostic Factor for Triple-Negative Breast Cancers in Chinese Women
Source: PLoS One. 2015 Jun 24;10(6):e0129741. doi: 10.1371/journal.pone.0129741 (PMC4479880; doi:10.1371/journal.pone.0129741)
Supplement: S1 Data — (XLSX) [file pone.0129741.s001.xlsx]

## Sheet: 工作表1
age	menstruation	gradegroup	t_size	N(0/1)	bmi-binary	Ctgroup	bcsm	os status	survival time
85	1	1	3.8	1	1	0	1	1	12.7333
84	1	2	1.9	0	3	0	0	0	16.4333
83	1	2	2	0	1	0	0	0	19.4
82	1	2	1.2	0	3	0	0	0	17.4333
81	1	1	4	1	1	0	1	1	12.7333
81	1	2	2	0	3	0	0	0	16.4333
80	1	2	6.5	1	3	1	1	1	20.9
79	1	2	3	1	1	1	0	0	12.5
79	1	2	1.7	0	1	0	0	0	19.4
79	1	2	1.5	0	3	0	0	0	17.4333
78	1	1	3	0	3	0	0	0	105.067
78	1	1	4.1	1	3	0	0	0	84.1333
78	1	2	2.5	1	1	0	0	0	113.567
78	0	1	1.5	0	3	1	0	0	14.5333
77	1	2	2	1	1	1	1	1	41.8
76	0	2	7.8	0	1	1	0	0	12.3
76	1	2	3.3	1	1	1	0	0	12.5
76	1	1	2	0	3	0	0	0	84.2333
76	0	1	1	0	3	1	0	0	14.5333
75	1	1	2.6	0	3	0	0	0	105.067
75	1	2	2.2	1	1	1	0	0	26.6667
75	1	1	1.5	0	3	0	0	0	84.2333
75	1	2	6	1	3	1	1	1	20.9
75	1	1	3.5	0	3	1	0	0	52.9
74	1	1	1.9	0	3	1	1	1	66
74	1	2	2.8	1	1	0	0	0	113.567
74	1	1	3	1	1	1	0	0	109.6
73	1	1	5	1	1	1	0	0	126.1
73	1	1	2.3	0	3	1	0	0	113.8
73	1	2	2.6	0	1	0	0	0	97.1667
73	1	2	2.5	1	1	1	0	0	26.6667
73	1	1	1.5	0	1	0	0	0	93.9667
73	1	1	3.5	0	3	1	0	0	25.3
72	1	2	2.2	1	1	1	1	1	52.9333
72	1	1	2.9	0	1	1	0	0	19.7667
72	1	2	1.7	0	3	1	0	0	126.767
72	1	1	3.3	0	1	1	0	0	122.833
72	1	2	2.5	0	1	0	0	0	97.1667
72	1	2	1.8	1	1	1	1	1	41.8
72	1	2	2	0	1	0	0	0	57.9333
71	1	2	3.3	0	1	0	0	0	13.9667
71	1	1	4.5	1	3	0	0	0	84.1333
71	1	1	2.5	0	3	1	0	0	113.8
71	1	1	1.5	1	1	1	1	1	22.2
71	1	1	2.1	1	3	1	0	0	21.6667
71	1	1	3	0	3	1	0	0	25.3
71	1	2	4.5	1	3	1	0	0	22.7
71	1	2	3	1	1	1	0	0	30.4333
71	1	1	3.1	1	1	1	0	0	109.6
71	1	1	1.2	1	3	1	0	0	16.6333
70	1	1	3	0	1	1	0	0	122.833
70	1	1	4.5	1	1	1	0	0	126.1
70	1	2	1.7	0	3	1	0	0	15.7667
70	1	2	6	1	1	0	1	1	33.2
70	1	1	4	0	3	1	0	0	52.9
70	1	2	2.8	0	1	0	0	0	19.5667
70	1	1	2	0	1	1	1	1	45.3333
69	1	2	3.8	1	1	1	0	0	44.7333
69	1	2	3	1	1	1	0	0	12.9333
69	1	1	2.7	0	1	1	0	0	37.2
69	1	2	2.5	1	3	1	0	0	51.5333
69	1	2	2	1	3	0	0	0	22.8667
69	1	1	1.7	0	1	0	0	0	93.9667
69	1	1	2	0	1	1	0	0	59.6
69	1	2	1.5	0	1	1	0	0	48.2
69	1	2	4	0	1	1	0	0	13.9333
69	1	2	2.7	1	1	1	0	0	30.4333
69	1	1	1.5	1	3	1	0	0	16.6333
68	1	2	2.1	1	1	1	1	1	52.9333
68	1	2	2	0	3	1	0	0	126.767
68	1	1	2.5	1	3	1	1	1	42.6667
68	1	1	2	0	3	1	0	0	114.467
68	1	1	1.8	1	1	1	1	1	22.2
68	1	2	2.3	0	1	1	0	0	47.9
68	1	2	3	0	3	1	0	0	56.8
68	1		1	1	1	1	0	0	60.4667
68	1	1	6	1	3	1	1	1	50.2667
68	1	2	1.8	0	1	1	0	0	48.2
68	1	2	4.2	1	3	1	0	0	22.7
68	1	1	1	0	3	1	0	0	20.2
68	1	2	2.2	0	3	1	0	0	19.5
68	1	1	2.5	1	3	0	0	0	38.2333
68	1	1	1.5	0	1	1	1	1	45.3333
67	1		1.8	0	1	1	0	0	136.8
67	0	2	9	0	1	1	0	0	12.3
67	1	2	3.3	1	1	1	0	0	20.8667
67	1	1	3	0	1	1	0	0	37.2
67	1		0.8	1	1	1	0	0	37.7
67	1	2	1.9	0	3	1	0	0	15.7667
67	1	2	1.7	1	3	0	0	0	22.8667
67	1	2	2	1	1	1	0	0	31.4333
67	1	1	1.5	1	1	1	0	0	91.6333
67	1	1	5	0	1	1	0	0	38.4333
67	0	2	1.8	0	3	1	0	0	63.1667
67	1	2	3.3	1	3	1	1	1	31.2333
67	1	1	2.2	1	3	1	0	0	21.6667
67	1	2	1.7	1	3	1	0	0	59.4
67	1	1	5.2	1	3	1	1	1	50.2667
67	1	2	1.5	0	3	1	0	0	50.4667
67	1	2	2.1	0	1	1	0	0	22.7333
67	1	1	1.5	0	1	1	1	1	2.23333
67	1	1	3.3	1	3	1	0	1	29.5333
66	1	1	2	0	3	1	1	1	66
66	1	1	2.7	1	3	1	1	1	42.6667
66	1	2	1.9	0	1	1	0	1	22.3
66	1	2	2.9	0	3	1	0	0	56.8
66	1	2	1.3	0	1	0	0	0	57.9333
66	1	1	0.8	0	3	1	0	0	20.2
66	1	2	1.8	0	1	1	0	0	12.7333
65	1			1	1	1	0	1	32.1667
65	1	2	1.4	0	3	1	0	0	13.1333
65	1	1	3	0	1	1	0	0	19.7667
65	1	2	2.3	0	3	1	0	0	19.5
65	1	1	1.4	1	1	1	1	1	37.1667
65	1	2	1.5	1	1	1	0	0	31.4333
65	1	2	5.5	1	1	0	1	1	33.2
65	1	1	2.7	0	3	1	0	1	63.5667
65	1	2	1.4	1	1	1	0	0	61.1
65	1	2	2.5	0	3	1	0	0	45.9333
65	1	2	3.8	0	1	1	0	0	13.9333
65	1	1	5	0	3	1	0	0	30.4333
65	1	1	1.2	1	3	0	0	0	21.4
65	1	2	2.5	0	3	1	0	0	19.5
65	1	2	3	0	1	0	0	0	19.5667
65	1	2	1.5	0	1	1	0	0	21.3667
65	1	1	1.2	1	3	1	0	0	14.4
65	1	2	2	0	1	1	0	0	12.7333
65	1	1	3	1	3	1	0	1	29.5333
64	1	1	3.3	1	1	1	0	0	12.7667
64	1	1	3	1	1	1	1	1	69.9333
64	1	1	1.8	0	3	1	0	0	114.467
64	1	2	1.7	0	1	1	0	0	12
64	1	2	2.5	0	1	1	0	0	47.9
64	1	2	2.7	0	3	0	0	0	92.1667
64	1	1	1.7	0	3	1	0	0	66.1667
64	1	2	1.8	0	1	1	0	0	22.2667
64	1	1	1.7	1	1	1	0	0	91.6333
64	1	1	1.5	0	1	1	1	1	68.9
64	1	2	3	1	3	1	1	1	30.0333
64	1	2	3.5	1	3	1	1	1	31.2333
64	1		1.5	1	1	1	0	0	60.4667
64	1	1	3.5	0	3	1	0	1	48.5333
64	1	2	1.5	0	3	1	0	0	50.4667
64	1	1	4	1	1	1	1	1	9.73333
64	1	1	2	0	3	0	0	0	18.8333
64	1	1	2.3	0	1	1	0	1	14.1
63	1	2	2.3	1	1	1	0	1	49.4333
63	1	2	4	1	1	1	0	0	44.7333
63	1	2	1.5	0	3	1	0	0	13.1333
63	1	1	3.2	1	3	1	0	0	132.833
63	1	2	2.9	1	3	0	1	1	40
63	1	1	1.6	0	3	1	0	0	35.8
63	1	1	3.2	1	1	1	1	1	69.9333
63	1		3.2	1	1	1	0	0	110.433
63	1	1	1.5	1	1	1	1	1	37.1667
63	1	1	1.8	0	3	1	0	0	106.767
63	1	1	2.7	0	1	1	0	0	133.6
63	1	2	2	0	1	1	0	1	22.3
63	1	2	2.4	0	3	1	0	0	93.5333
63	1	2	2.5	0	1	1	0	0	60.8
63	0	2	2	1	1	1	0	0	67.7667
63	0	2	2	0	3	1	0	0	63.1667
63	1	2	2	0	3	0	0	0	47.9333
63	1	2	3	0	3	1	0	0	57.4667
63	1	1	2	1	3	1	1	1	62.6
63	1	2	1.5	0	3	1	0	0	20.9
63	1	2	3.5	0	3	1	0	0	47.5333
63	1	1	3.8	1	1	1	1	1	9.73333
63	1	1	4.5	0	3	1	0	0	30.4333
63	1	2	2	0	1	0	1	1	15.9667
63	1	2	2.4	0	1	1	0	0	22.7333
63	1	1	1.5	1	3	0	0	0	21.4
63	1	1	1.6	1	1	1	0	0	19.4667
63	1	1	3	1	3	0	0	0	38.2333
63	1	2	2	0	1	1	0	0	21.3667
63	1	1	1.5	1	3	1	0	0	14.4
63	1	1	2.6	0	1	1	0	1	14.1
62	1	2	2.5	1	1	1	0	0	12.9333
62	1	1	2.6	0	1	1	0	0	118.967
62	1	2	3.5	1	1	1	0	0	18.7667
62	1	2	2.1	0	1	1	0	0	20.5
62	1	1	2	0	1	1	0	0	130.4
62	1	1	2.5	0	3	1	0	1	63.5667
62	1	2	1.5	1	1	1	0	0	61.1
62	1	1	1.6	0	3	1	0	0	61
62	1	1	1.8	0	1	1	0	0	59.6
62	1	2	1.5	0	3	1	0	0	57.5
62	1	2	1.8	0	1	1	0	0	12.2
62	1	1	3.2	1	3	1	0	0	19.3
62	1	1	3.1	0	3	1	0	1	48.5333
62	1	2	3	0	3	1	0	0	45.9333
62	1	1	1.8	1	3	1	0	0	18.3333
62	1	1	1.8	0	1	1	1	1	2.23333
62	1	2	3	1	1	1	0	0	17.6
62	1	2	2.8	0	1	1	0	0	13.6333
62	1	2	3.2	0	1	1	0	0	35.7667
62	1	1	1.4	1	1	1	0	0	93.6667
61	1		2	0	1	1	0	0	136.8
61	1	1	3	1	3	1	0	0	132.833
61	1	1	2	0	3	1	0	0	35.8
61	1	2	2.8	1	3	1	0	0	51.5333
61	1	1	0.9	0	1	1	0	0	38.5667
61	1	2	3	0	1	1	0	0	48.8667
61	1	2	2.5	0	3	1	0	0	19.5
61	1	2	1.5	0	1	1	0	0	12
61	1	1	1	0	3	1	0	0	106.767
61	1	1	3	0	1	1	0	0	133.6
61	1	1	2	0	3	1	0	0	66.1667
61	1	2	2.9	0	3	1	0	0	93.5333
61	1	2	3	0	1	1	0	0	40
61	1	1	4.5	0	1	1	0	0	38.4333
61	1	2	2	1	3	1	0	0	59.4
61	1	2	2	0	1	1	0	0	12.2
61	1	1	1.6	0	1	1	0	0	53.5667
61	1	2	1.5	1	3	1	0	1	40.1
61	1	1	3.4	1	3	1	0	0	33.4
61	1	2	1.8	0	1	0	1	1	15.9667
61	1	2	2.5	0	1	1	0	0	20.6667
61	1	2	2	0	3	1	0	0	55.6667
61	1	1	0.5	0	3	0	0	0	18.8333
61	1	1	3	0	1	1	0	0	13.7
61	1	2	3.3	0	3	1	0	0	12.5
61	0	1	2	0	1	1	0	0	106.767
60	1	1	1.4	0	1	1	0	0	137.867
60	1	2	2.9	0	1	0	0	0	13.9667
60	1	1	1.2	0	1	1	0	0	108.233
60	1	1	2.4	0	1	1	0	0	118.967
60	1		1	1	1	1	0	0	37.7
60	1	1	1	0	1	1	0	0	38.5667
60	1	2	2.4	0	3	0	0	0	92.1667
60	1	2	1.5	0	3	0	0	0	47.9333
60	1	2	3.5	0	1	1	0	0	47.9333
60	1	1	1.8	0	1	1	0	0	49.2
60	1	1	3.6	1	3	1	0	0	19.3
60	1	1	2	0	1	1	0	0	95.6333
60	1	2	3	0	3	1	0	0	47.5333
60	1	1	1.5	1	3	1	0	0	18.3333
60	1	2	2.5	1	3	1	0	0	22.5333
60	1	2	1.5	0	3	1	0	0	55.6667
60	1	2	2.2	0	1	1	0	0	13.6333
60	1	1	1	1	1	1	0	0	93.6667
59	1	1	3.5	1	1	1	0	0	12.7667
59	1	1	1.5	0	1	1	0	0	130.8
59	1	2	3.5	1	3	0	1	1	40
59	1	2	1.5	1	1	1	0	0	20.9
59	1	1	2.5	1	3	1	0	0	126.3
59	1	1	1.4	1	3	1	0	0	114.467
59	1	2	2	0	1	1	0	0	20.5
59	1	2	2.2	0	3	1	0	1	35.9
59	1	1	1.9	0	1	1	0	0	130.4
59	1	2	3.2	1	1	1	0	0	64.3
59	1	2	2.3	0	1	1	0	0	60.8
59	0	2	5	1	1	1	0	0	44.7667
59	1	2	4.2	0	3	1	0	1	63.3667
59	1	1	1.1	1	3	1	1	1	62.6
59	1		2	0	3	1	0	0	12.2
59	1	2	2	0	3	1	0	0	20.9
59	1	1	2.5	1	1	1	0	0	112.4
59	1	2	1.8	1	3	1	0	1	40.1
59	1	2	2.2	0	3	1	0	0	38.6667
59	1	2	2	0	1	1	0	0	34.6333
59	1	1	0.3	0	1	1	0	0	133.867
59	1	2	2.2	0	1	1	0	0	22.5
59	1	2	7.5	1	1	0	1	1	12.1
59	1	1	1	1	1	1	0	0	19.4667
59	1	2	2	0	3	1	0	0	15.5
59	1	2	3.2	0	1	1	0	0	14.1
59	1	2	2.7	0	1	1	0	0	35.7667
59	1	2	3	0	3	1	0	0	12.5
58	1	2	1.2	1	1	1	0	0	124.1
58	1	1	2.8	1	3	1	0	0	23.2333
58	1	1	3.2	1	3	1	1	1	45.7333
58	1	1	3	0	3	1	0	0	63.0667
58	1	2	2	0	1	1	0	0	22.2667
58	1	1	2	0	3	0	0	0	95.0333
58	1	1	4.3	0	1	1	0	0	63.5667
58	1	1	1.7	0	3	1	0	0	61
58	1	2	2.7	0	1	1	0	0	23.7667
58	1	2	2	0	3	1	0	0	57.5
58	1	2	3	0	1	1	0	0	48.8667
58	1	1	2	0	1	1	0	0	49.2
58	1	1	2	1	1	1	0	0	123.6
58	1	2	3.8	1	1	1	0	0	49.7667
58	1	2	5	0	3	1	0	0	47.3
58	1	2	1.8	0	1	1	0	0	46.4
58	1	2	5	0	3	1	0	0	47.2667
58	1	2	2.5	0	3	1	0	0	63.1667
58	1	2	3.8	1	3	1	0	0	40.6667
58	1	1	4	1	3	1	0	0	33.4
58	0	2	1.5	0	1	1	0	0	14.5333
58	1	2	2.5	0	3	1	0	0	20.6333
58	1	2	2.8	1	1	1	0	0	17.6
58	1	1	1	0	1	1	0	0	17.3667
58	1	1	1.5	0	3	1	0	0	15.3667
58	0	1	2.2	1	1	1	0	0	13.9667
58	1	1	2.6	0	1	1	0	0	13.7
57	1	2	2.5	1	1	1	0	1	49.4333
57	1	2	2.3	0	1	1	0	0	22.0667
57	1	1	3.4	1	3	1	0	0	127.867
57	1	1	1.8	0	1	1	0	0	118.367
57	1	1	3.4	0	1	1	0	0	124.733
57	1	2	3	1	1	1	0	0	18.7667
57	1	1	1.5	0	1	1	0	0	123.867
57	1	1	1.6	1	1	1	0	1	116.367
57	1	1	3	0	3	1	1	1	39.4333
57	1	1	3.2	1	3	1	0	0	113.133
57	1		3	1	1	1	0	0	110.433
57	1	2	1.8	0	1	1	0	0	23.2
57	1	2	2.8	1	1	1	0	0	21.9
57	1	2	7	1	1	1	1	1	26.2
57	1	1	2	0	3	1	0	0	18.5333
57	0	2	4.5	1	1	1	0	0	44.7667
57	1	2	3.5	1	3	1	0	0	88.3667
57	1	2	3.5	0	1	1	0	0	40
57	1	2	3	1	3	1	1	1	43
57	1	2	3	0	3	1	1	1	24.9
57	1	2	2.5	1	3	1	1	1	30.0333
57	1	2	2.8	0	1	1	0	0	17.3667
57	1	2	3	0	3	1	0	1	58.9
57	1	1	1.2	1	1	1	0	1	57.7
57	1	2	3.2	0	3	1	0	0	57.4667
57	1	1	2	0	1	1	0	0	53.5667
57	1		1.7	0	3	1	0	0	12.2
57	1	1	3	1	1	1	0	0	112.4
57	0	1	3	0	1	1	0	0	96.9333
57	1	1	1.6	0	1	1	0	0	95.6333
57	1	2	3.8	1	3	1	0	0	16.4667
57	1	2	2	0	1	1	0	0	46.4
57	0	1	3	1	1	1	0	0	44.5
57	1	2	3	0	3	1	0	0	43.5
57	1	2	2	0	3	1	0	0	43.2
57	1	2	2.5	1	3	1	0	0	35.5667
57	1	2	1.9	0	1	1	0	0	34.6333
57	0	1	3.2	0	3	1	0	0	35.1667
57	1	1	0.8	0	1	1	0	0	133.867
57	1	1	2.8	0	1	1	0	0	135.467
57	1	2	1.6	0	1	1	0	0	14.8667
57	1	2	3	1	3	1	0	0	22.5333
57	1	1	2.6	1	1	1	0	0	13.1333
57	1	1	1.8	0	3	1	0	0	21.5667
57	1	2	5.5	0	1	1	0	0	19.5
57	1	2	3.7	1	1	1	0	0	31.1333
57	1	1	3.2	0	1	1	0	0	87.8667
57	0	2	2	0	1	1	0	0	18.7333
57	1	1	2	0	1	1	0	0	17.3667
57	1	1	2	0	1	1	0	0	29.0667
57	1	2	3.5	0	1	1	0	0	14.1
57	0	1	2.5	1	1	1	0	0	13.9667
57	1	1	2.1	0	1	1	0	0	12.7
56	1	1	0.7	0	1	1	0	0	108.233
56	1	1	1.7	0	1	1	0	0	118.367
56	1	2	1.5	1	1	1	0	0	124.1
56	1	2	1.7	1	3	1	0	0	14.1667
56	1	2	3.8	1	1	1	0	0	18.9667
56	1	2	1.7	1	3	1	0	0	37.9
56	1	2	3.7	0	3	1	1	1	12
56	1	2	2.5	0	3	1	0	1	35.9
56	1	2	3.2	1	1	1	0	0	21.9
56	0	1	3.5	0	3	1	0	0	131.567
56	1	1	1.5	0	3	0	0	0	95.0333
56	1	2	2	1	3	1	0	0	69.7
56	1	1	5	0	1	1	0	0	63.5667
56	1	2	2.5	1	3	1	0	0	59.4
56	1	2	3	0	1	1	0	0	23.7667
56	1	2	2	1	1	1	0	0	18.1
56	1	1	3.5	1	1	1	0	0	104.1
56	1	2	4	1	1	1	0	0	49.7667
56	1	2	4.5	0	3	1	0	0	47.3
56	0	2	3	0	1	1	0	0	46.0333
56	1	2	1.8	0	3	1	0	0	43.2
56	1	2	2.5	0	3	1	0	0	38.6667
56	1	2	3.5	0	1	1	0	0	32.4
56	1	1	1.2	0	1	1	0	0	98.5
56	1	2	2.8	0	3	1	0	0	20.6333
56	1	1	1.5	0	1	1	0	0	15.5333
56	1	2	1.4	0	3	1	0	0	15.5
56	1	1	1.9	0	3	1	0	0	15.3667
56	1	2	2	0	1	1	0	0	17.7
56	1		8	1	1	1	1	1	13.0667
56	0	1	1	0	1	1	0	0	106.767
55	1	1	1.8	0	1	1	0	0	130.8
55	0		6.8	1	3	1	0	0	104.133
55	1	2	3.6	1	1	1	0	0	18.9667
55	1	1	1.5	1	3	1	0	0	114.467
55	1	1	2.5	1	3	1	0	0	23.2333
55	1	1	3	1	3	1	1	1	45.7333
55	1	2	2.8	1	1	1	0	0	64.3
55	1	2	2.5	1	3	1	0	0	87.2
55	0	1	2	0	1	1	0	0	20.4
55	1	2	3	0	1	1	0	0	17.3667
55	1	2	2.8	1	3	1	0	0	59.4
55	1	2	2	0	3	1	0	0	64.9667
55	0	2	2	0	1	1	0	0	57.3333
55	1	2	2.5	1	3	1	0	0	16.4667
55	1	1	1.5	1	1	1	0	0	123.6
55	1	2	3.5	0	3	1	0	0	47.2667
55	1	2	3	0	3	1	0	0	63.1667
55	1	2	4	1	3	1	0	0	40.6667
55	1	2	1.9	0	1	1	0	0	35.6333
55	1	2	1.5	0	1	1	0	0	19.1
55	1	1	2.5	0	1	1	0	0	135.467
55	0	2	2.5	0	3	1	0	0	36.7667
55	1	2	2.7	0	1	1	0	0	22.5
55	1	1	2.8	1	1	1	0	0	13.1333
55	1	2	3	0	1	1	0	0	20.6667
55	1	1	2	0	3	1	0	0	21.5667
55	1	2	2.5	0	3	1	0	0	19.8
55	1	2	1.5	0	1	1	0	0	19.1
55	0	2	1.7	0	1	1	0	0	18.7333
55	1	2	3	1	1	1	0	0	18.1667
55	0	1	2.5	0	1	1	0	0	32.6333
55	0	2	1	1	3	1	0	0	17.1333
54	0	1	3.8	1	1	1	0	0	51.7333
54	1	1	3.3	1	3	1	0	0	131.2
54	1	1	3	1	3	1	0	0	127.867
54	0		7	1	3	1	0	0	104.133
54	1	2	1.3	1	1	1	0	0	20.9
54	1	1	1.3	0	1	1	0	0	123.867
54	1	2	2.5	0	3	1	0	0	50.3
54	1	1	2	1	1	1	0	1	116.367
54	1	1	2.8	0	3	1	1	1	39.4333
54	1	2	3.5	0	3	1	1	1	12
54	1	1	3	1	3	1	0	0	113.133
54	1	2	3.5	0	1	1	0	0	47.9333
54	1	1	1.4	1	3	0	1	1	43.5667
54	1	2	5.5	1	1	1	1	1	26.2
54	0	1	4.5	0	3	1	0	0	92.2333
54	1	1	1.8	0	3	1	0	0	18.5333
54	1	2	4	1	3	1	0	0	88.3667
54	1	1	1.8	0	1	1	1	1	68.9
54	1	2	4	0	3	1	0	1	63.3667
54	1	1	3	0	1	1	0	0	134.333
54	1	1	1.5	1	1	1	0	1	57.7
54	1	2	2.5	0	3	1	0	0	57.7667
54	0	2	2	0	3	1	0	0	65.4667
54	1	1	4	1	1	1	0	0	104.1
54	0	1	2.8	0	1	1	0	0	96.9333
54	0	1	3.5	1	1	1	0	0	44.5
54	0	1	1.6	0	3	1	0	0	43.7
54	0	2	1.8	0	1	1	0	0	47.5333
54	0	2	3	1	1	1	0	0	15.3667
54	1	2	0.5	1	1	1	0	0	36.9333
54	1	2	3.4	0	1	1	0	0	32.4
54	1	1	5	0	3	1	0	0	29.4667
54	1	2	1.3	0	1	1	0	0	14.8667
54	1	1	1.5	0	1	1	0	0	98.5
54	0	2	3.5	1	3	1	0	0	22.0333
54	1	2	5.2	0	1	1	0	0	19.5
54	1	2	6.8	1	1	0	1	1	12.1
54	0	1	3.8	1	1	1	0	0	107.7
54	1	2	2.8	1	1	1	0	0	18.1667
54	1	2	1.8	0	1	1	0	0	17.7
54	1	1	1.6	1	3	1	0	0	14.8667
54	1	2	7	1	3	1	0	1	14.8
54	1		6	1	1	1	1	1	13.0667
53	1			1	1	1	0	1	32.1667
53	1	2	3	1	1	1	0	0	20.8667
53	1	2	2.5	0	1	1	0	0	22.0667
53	0	1	4.5	0	1	1	0	0	132.633
53	0	2	5.5	0	3	1	0	0	92.7333
53	1	1	2.3	1	3	1	0	0	126.3
53	1	2	1.9	1	3	1	0	0	14.1667
53	1	2	1.5	1	3	1	0	0	37.9
53	1	2	1.6	0	1	1	0	0	23.2
53	1	2	3	1	3	1	0	0	87.2
53	1	2	1.9	1	3	1	0	0	69.7
53	0	2	1.6	1	1	1	0	0	67.7667
53	1	1	1.8	0	3	1	0	0	97.2
53	0	2	1.2	0	1	1	0	0	61.0667
53	1	2	2.5	0	3	1	0	1	58.9
53	0	2	3	1	1	1	0	0	58.5
53	1	2	2.3	0	3	1	0	0	57.7667
53	1	2	3	1	3	1	0	0	56.6333
53	0	2	1.6	0	3	1	0	0	65.4667
53	0	2	4.8	0	1	1	0	0	52.8667
53	1	2	1.8	1	1	1	0	0	18.1
53	1	1	3	0	1	1	0	0	50.5
53	0	1	1	0	3	1	0	0	122.233
53	0	2	2.7	0	1	1	0	0	46.0333
53	1	2	2.5	0	3	1	0	0	103.3
53	1	2	2.6	1	3	1	0	0	35.5667
53	0	1	2.8	0	3	1	0	0	35.1667
53	1	2	3.7	1	1	1	0	0	31.1333
53	1	1	4	1	1	1	0	0	30.6667
53	1	1	4.5	0	3	1	0	0	29.4667
53	1	1	4.2	1	3	1	0	0	15.2667
53	0	2	2	0	1	1	0	0	14.5333
53	0	2	2.6	1	3	1	0	0	22.0333
53	0	1	2.5	1	1	1	0	0	96.9667
53	1	2	3	1	1	1	0	0	12.2667
53	1	2	1.8	1	1	1	0	0	20.2
53	0	2	3	0	3	1	0	0	113.5
53	1	2	2.5	0	3	1	0	0	19.8
53	1	1	3	0	1	1	0	0	87.8667
53	0	2	1.5	1	3	1	0	0	17.1333
53	1	1	1.8	0	1	1	0	0	15.5333
53	1	1	1.6	0	1	1	0	0	29.0667
53	0	2	4.5	0	3	1	0	0	14.8333
53	1	2	6	1	3	1	0	1	14.8
53	1	1	2.3	0	1	1	0	0	12.7
53	0	2	1.4	1	1	1	0	0	12.4333
52	0	1	3.5	1	1	1	0	0	51.7333
52	1	1	3	1	3	1	0	0	131.2
52	1	1	1.5	1	3	0	1	1	43.5667
52	1	1	2.8	0	3	1	0	0	63.0667
52	0	1	4.2	0	3	1	0	0	92.2333
52	1	2	3.5	1	3	1	1	1	43
52	0	1	1.8	0	1	1	0	0	20.4
52	1	1	3.6	0	1	1	0	0	134.333
52	1	2	1.7	0	3	1	0	0	64.9667
52	0	2	5	0	1	1	0	0	52.8667
52	0	1	2	0	3	1	0	0	43.7
52	1	2	3.1	0	3	1	0	0	43.5
52	0	2	1.5	0	1	1	0	0	47.5333
52	1	2	1	1	1	1	0	0	36.9333
52	1	1	4.5	1	1	1	0	0	30.6667
52	1	1	4.5	1	3	1	0	0	15.2667
52	0	2	2.8	0	3	1	0	0	36.7667
52	1	1	3	1	3	1	0	0	108.167
52	0	1	3	1	1	1	0	0	96.9667
52	0	2	2	0	1	1	0	0	13.6333
52	1	2	2	1	1	1	0	0	20.2
52	0	2	2.8	0	3	1	0	0	113.5
52	0	1	3.5	1	1	1	0	0	107.7
52	0	1	2.4	1	3	1	0	0	18.8
52	0	1	2.8	0	1	1	0	0	32.6333
52	1	1	2	1	3	1	0	0	14.8667
52	0	2	5	0	3	1	0	0	14.8333
51	1	1	1.5	0	1	1	0	0	137.867
51	0	1	5	0	1	1	0	0	132.633
51	0	2	7	0	3	1	0	0	92.7333
51	1	1	3	0	1	1	0	0	124.733
51	1	2	2.2	0	3	1	0	0	50.3
51	0	1	3	0	3	1	0	0	131.567
51	1	2	3.3	0	3	1	1	1	24.9
51	1	1	1.5	0	3	1	0	0	97.2
51	0	2	1.3	0	1	1	0	0	61.0667
51	0	2	3.2	1	1	1	0	0	58.5
51	0	2	1.8	0	1	1	0	0	57.3333
51	1	2	2.8	1	3	1	0	0	56.6333
51	1	1	2.5	0	1	1	0	0	50.5
51	0	1	0.8	0	3	1	0	0	122.233
51	0	2	2.8	1	1	1	0	0	15.3667
51	1	2	3	0	3	1	0	0	103.3
51	1	2	2	0	1	1	0	0	35.6333
51	1	1	2.5	1	3	1	0	0	108.167
51	1	2	2.8	1	1	1	0	0	12.2667
51	0	1	2.2	1	3	1	0	0	18.8
51	0	2	1.2	1	1	1	0	0	12.4333
50	0	1	3	0	1	1	0	0	131.233
50	1	1	1.7	0	3	1	0	0	122.433
50	0	2	1.8	1	3	1	1	1	32.0333
50	0	2	6	1	1	1	0	0	61
50	0	1	2.6	0	1	1	0	0	117
50	1	2	3	0	3	1	0	0	114.533
50	1	2	3.5	0	3	1	0	0	22.5333
50	1	1	1.4	1	1	1	1	1	68.8333
50	0	2	1.8	0	3	1	0	0	55.2333
50	0	1	1.2	0	1	1	0	0	47.9333
50	1	1	1.8	1	1	1	0	0	96.1
50	1	2	1.5	0	1	1	0	0	31.0667
50	0	2	1.5	0	3	1	0	0	23.2667
50	0	2	1.5	0	1	1	0	0	13.6333
50	0	2	3	0	3	1	0	0	14.6
50	0	1	5	1	1	1	0	0	15.0667
50	0	1	1.8	0	1	1	0	0	130.767
50	1	1	1.2	0	1	1	0	0	133.833
50	0	2	3.2	1	1	1	0	0	13.4667
50	1	2	0.8	0	1	1	0	0	12.3
49	0	2	2.8	1	1	1	0	0	30.4
49	0	1	2.7	0	1	1	0	0	110.8
49	1		1	1	1	1	0	0	133.9
49	0	2	1.7	0	1	1	0	0	131.8
49	0	1	2.5	0	1	1	0	0	131.233
49	1	1	2.4	1	3	1	0	0	13.3667
49	0	1	1.6	1	3	1	0	1	55.6333
49	0	1	0.8	0	1	1	1	1	36.7667
49	0			1	1	1	0	0	124.8
49	0	1	2.7	0	1	1	0	0	126.933
49	0	1	3	0	1	1	0	0	117
49	0	1	3	0	1	1	0	0	112.1
49	0	2	2.2	0	1	1	0	0	12.8667
49	1	1	2.9	0	3	1	0	0	104.167
49	1			1	1	1	0	1	80.6667
49	0	1	1.3	0	1	1	0	0	94.9333
49	1	2	1.6	1	3	0	0	0	94.4
49	1	1	1.8	0	3	1	0	0	89.8
49	0	2	3	0	3	1	0	0	37.2333
49	0	2	2.5	0	3	1	0	0	65.0667
49	0	2	3	1	1	1	0	0	65
49	0	1		0	1	1	0	0	65.2667
49	0	1	6.5	0	1	1	0	0	136.133
49	0	2	4	0	1	1	0	0	12
49	0	1	1.7	0	1	1	0	0	56.8
49	0	2	2	0	3	1	0	0	52.3667
49	0	2	5	0	1	1	0	1	47.9
49	0	2	2	0	3	1	0	0	16.7667
49	0	2	3	0	1	1	0	0	55.6333
49	1	1	1.5	1	3	1	1	1	38.1
49	0	2	2	0	1	1	0	0	44.9333
49	0	2	1.7	0	1	1	0	0	30.7
49	0	2	1	1	1	1	0	1	42.3667
49	0	2	3	1	1	1	1	1	19.7333
49	1	2	3	1	3	1	0	0	39.3667
49	0	1	1.5	1	3	1	0	0	113.833
49	0	1	1.8	0	3	1	0	0	88.1
49	0	2	2.5	1	3	1	0	0	38.8
49	0	1	4	0	3	1	0	0	36.1
49	1	2	4	0	3	1	0	0	37.6667
49	1	1	2.5	1	1	1	0	0	34.8667
49	0	1	2.5	1	3	1	0	0	32.5
49	1	2	2	0	1	1	0	0	31.0667
49	1	1	2.5	0	3	1	0	0	26
49	0	2	1.5	0	1	1	0	0	92.0333
49	0	2	2	0	3	1	0	0	23.2667
49	0	2	1.8	0	1	1	0	0	22.2667
49	1	2	2	0	1	0	0	0	99.3667
49	0	2	1.9	0	1	1	0	0	21.6333
49	0	2	2.8	0	3	1	0	0	14.6
49	0	1	1	0	1	1	0	1	96.9333
49	1	1	2	0	1	1	0	0	18.5667
49	0	1	4.5	1	1	1	0	0	15.0667
49	0	1	4.5	1	1	1	0	0	127.633
49	0	1	2	0	1	1	0	0	130.767
49	1	1	2	0	3	1	0	0	13.5
49	0	1	2	0	1	1	0	0	47.3
48	0	2	1.3	0	1	1	0	0	17.9667
48	0	1	2.7	0	3	1	0	0	135.967
48	1		1.3	0	1	1	0	0	14.8
48	0	2	2	0	1	1	0	0	131.8
48	0	2	4.1	1	3	1	0	0	129.4
48	0	2	2.8	1	1	1	0	0	128.667
48	0	1	1.5	0	1	1	0	0	127.867
48	0	2	4.2	1	3	1	0	0	125.233
48	0	2	1.7	1	3	1	0	0	120.933
48	0		4.2	1	1	1	0	0	18.0667
48	0		2.8	1	1	1	0	0	23.7667
48	1	1	2.5	0	3	1	0	0	104.167
48	0	2	1.9	0	3	1	0	0	46.9667
48	0	2	2.5	0	3	1	0	0	92.5
48	1	1	1.8	0	3	1	0	0	31.6
48	0	1	1.7	0	1	1	0	0	68.4333
48	0	1	2.5	1	1	1	0	0	114.633
48	0	2	2.8	0	3	1	0	0	59.8
48	1	2	3	1	3	1	1	1	13.9333
48	0	1	6.6	1	3	1	1	1	17.5333
48	0	1	1.8	0	1	1	0	0	47.9333
48	0	2	4	0	1	1	0	1	47.9
48	1	1	1.8	1	3	1	1	1	38.1
48	0	2	1.8	0	1	1	0	0	44.9333
48	0	2	2	0	1	1	0	0	30.7
48	1	2	3.5	1	3	1	0	0	39.3667
48	1	1	2.8	0	1	1	0	0	95.0667
48	0	2	2.9	1	3	1	0	0	38.8
48	1	1	2.7	1	1	1	0	0	34.8667
48	1	2	3	0	3	1	0	0	34.6333
48	0	2	2.5	0	3	1	0	0	33
48	0	2	1	0	3	1	0	0	127.533
48	0	2	1.8	1	1	1	0	1	58.9
48	0	2	2.8	0	3	1	0	0	24.8667
48	0	1	3.5	1	1	1	1	1	46.8
48	1	2	6	1	3	1	0	0	18.6
48	0	2	3.5	1	1	1	0	0	17.7
48	0	2	2	1	1	1	0	0	17.4333
48	0	2	2.5	1	1	1	0	0	17.3667
48	0	1	5	1	1	1	0	0	127.633
48	0	2	2	0	3	1	0	0	14.6
48	0	2	2.2	0	1	1	0	0	13.7
48	0	1	2.5	1	3	1	0	0	18.1333
48	0	2	3	0	1	1	0	0	48.8333
48	1	1	1.9	0	3	1	0	0	13.5
48	0	1	1	0	3	1	0	0	13.4
48	0	1	1	0	1	1	0	0	113.8
48	0	2	1.3	1	1	1	0	0	14.2333
47	0	2	2.5	1	1	1	0	0	30.4
47	0	1	3.5	0	1	1	0	0	19.5333
47	0		2.8	0	3	1	0	0	136
47	0	1	4.2	1	1	1	0	0	134.5
47	0	2	4	1	1	1	0	0	31.3667
47	0	1	2.8	0	1	1	0	0	131.9
47	0	2	2	1	3	1	1	1	32.0333
47	0		2	1	1	1	0	0	135.733
47	0	2	9	1	1	1	0	0	61
47	0	2	0.6	1	1	1	0	0	48.1667
47	0	1	3.3	0	1	1	0	0	112.1
47	0	2	2	0	1	1	0	0	12.8667
47	1	2	4	0	3	1	0	0	22.5333
47	1			1	1	1	0	1	80.6667
47	1	1	2	0	3	1	0	0	89.8
47	0	2	3.3	0	3	1	0	0	37.2333
47	1	2	2	0	1	1	0	0	67.4667
47	0	1	2.2	0	1	1	0	0	65.6667
47	0	1		0	1	1	0	0	65.2667
47	0	2	1.9	0	3	1	0	0	62.9333
47	0	1	1.5	0	1	1	0	0	127.867
47	0	1	2	0	3	1	0	0	62.4333
47	0	2	3.8	0	1	1	0	0	12
47	0	2	4.6	1	1	1	0	0	59.9
47	0	1	1.5	0	1	1	0	0	56.8
47	0	2	1.8	0	1	1	0	0	55.2333
47	0	2	6	1	3	1	0	0	85.5667
47	0	2	2	0	3	1	0	0	55.2333
47	0	2	1.5	0	3	1	0	0	16.7667
47	0	2	2.8	0	1	1	0	0	55.6333
47	0	2	2.5	0	1	1	0	0	129.267
47	0	1		0	1	1	0	0	44.9667
47	0	2	1.2	1	1	1	0	1	42.3667
47	0	2	3.5	1	1	1	1	1	19.7333
47	0	1	2	1	3	1	0	0	113.833
47	0	1	3	0	1	1	0	0	37.5
47	0	1	2	0	3	1	0	0	88.1
47	0	2	4.2	0	1	1	0	0	36.0667
47	0	2	3.1	1	1	1	1	1	21.7667
47	0	1	3	0	1	1	0	0	35.4
47	0	1	6	1	3	1	1	1	24.7667
47	0	1	3	1	3	1	0	0	32.5
47	1	1	2	1	1	1	0	0	96.1
47	1		5.5	0	1	1	0	0	113.467
47	0	2	1.2	0	1	1	0	0	22.2667
47	1	2	1.8	0	1	0	0	0	99.3667
47	0	2	2	0	1	1	0	0	21.6333
47	1	2	1.6	0	1	1	0	0	21.1
47	0	2	2.5	0	1	1	0	0	129.267
47	1	2	5.5	1	3	1	0	0	18.6
47	0	2	1.8	1	1	1	0	0	17.4333
47	0	1	1	0	3	1	0	0	114.933
47	0	2	3	0	1	1	0	0	13.7
47	1	1	1	0	1	1	0	0	133.833
47	0	2	3	1	1	1	0	0	13.4667
47	1	2	1	0	1	1	0	0	12.3
47	0	2	1.8	1	1	1	0	0	14.2333
46	0	1	2.3	1	3	1	1	1	42.6
46	1	1	2.5	1	3	1	0	0	13.3667
46	0		4.2	1	3	1	1	1	34.6667
46	0	1	6.5	0	1	1	0	0	136.133
46	0	2	4	1	3	1	0	0	125.233
46	0			1	1	1	0	0	124.8
46	0	2	1	1	1	1	0	0	48.1667
46	0	2	1.8	1	1	1	0	0	52.8667
46	0		4	1	1	1	0	0	18.0667
46	0	2	2	0	3	1	0	0	46.9667
46	0	2	5	0	1	1	0	0	92.3
46	0	1	3	1	3	1	0	0	88.7667
46	0	1	1.3	0	1	1	0	0	18.8333
46	0	2	3.5	1	3	1	1	1	40.3667
46	1	2	1.5	0	1	1	0	0	67.4667
46	0	1	2	0	3	1	0	0	67.3667
46	0	2	5	1	3	1	1	1	13.5667
46	0	1	2	0	1	1	0	0	68.4333
46	0	2	2.8	0	3	1	0	0	65.0667
46	0	1	2.3	1	1	1	0	0	114.633
46	1	2	2.5	1	3	1	1	1	13.9333
46	0	1	7	1	3	1	1	1	17.5333
46	0	2	1.8	0	3	1	0	0	52.3667
46	0	2	2.6	0	3	1	0	0	50.6
46	0			1	3	1	0	0	96.1
46	0	2	3	1	1	1	1	1	21.7667
46	0	2	3	0	3	1	0	0	33
46	0	2	1.2	0	3	1	0	0	127.533
46	0	2	1.8	0	1	1	0	0	92.0333
46	0	2	3	0	3	1	0	0	19.7333
46	0	1	2	0	1	1	0	0	21.9
46	0	1	2.7	1	1	1	0	0	87.3333
46	0	2	2.6	1	1	1	0	0	17.7
46	0	2	2.3	1	1	1	0	0	17.3667
46	0	1	2.5	0	3	1	0	0	127.267
46	0	1	4.2	1	3	1	0	0	14.6
46	0	1	2.7	1	3	1	0	0	18.1333
46	0	2	2.2	0	1	1	0	0	48.8333
46	0	1	1.5	0	3	1	0	0	13.4
46	0	1	1.7	0	1	1	0	0	47.3
45	0	1	5.5	1	3	1	1	1	16.5667
45	0	2	1.5	0	1	1	0	0	17.9667
45	0		3	0	3	1	0	0	136
45	0	2	4.5	1	3	1	0	0	129.4
45	0	1	1	0	1	1	1	1	36.7667
45	0	1	1.8	1	3	1	0	0	22.3333
45	1	1	1.5	0	3	1	0	0	122.433
45	0	1	1	0	1	1	0	0	109.767
45	0		3	1	1	1	0	0	23.7667
45	1	1	1.5	1	1	1	1	1	68.8333
45	0	1	1.2	1	3	0	0	0	91.8667
45	0	2	5	1	1	1	0	0	59.9
45	0	2	3.3	0	3	1	1	1	32.9667
45	1	2	4.2	1	1	1	0	0	22.3
45	0	1	1.5	1	1	1	0	0	51.7
45	0	1		0	1	1	0	0	44.9667
45	0	2	3	0	1	1	0	0	44.4667
45	0	2	0.8	0	1	1	0	0	44.5
45	1	2	3.8	0	3	1	0	0	37.6667
45	1	2	2.5	0	1	0	0	0	34.9333
45	1	2	2.9	0	3	1	0	0	34.6333
45	0	1	1.4	0	1	1	0	0	116.567
45	1	1	2.8	0	3	1	0	0	26
45	0	2	1.5	1	1	1	0	1	58.9
45	0	2	2.3	0	3	1	0	0	23.2667
45	0	2	2.5	0	1	1	0	0	20.9333
45	0	1	3	1	1	1	1	1	46.8
45	0	1	2	1	1	1	0	0	20.3667
45	0	1	1.5	0	1	1	0	0	33.1667
45	0	1	0.8	0	3	1	0	0	114.933
45	0	1	4	1	1	1	0	0	14.6
45	0	1	3	0	3	1	0	0	127.267
45	0	1	2	0	1	1	0	0	118.667
45	0	1	1.5	0	1	1	0	0	113.8
44	0	1	3	0	1	1	0	0	131.9
44	0	2	2.2	0	3	1	0	0	124.8
44	0	1	1	1	3	1	0	0	22.3333
44	0	2	2	1	3	1	0	0	120.933
44	0	1	1.3	0	3	1	0	0	105.533
44	1	1	2	0	3	1	0	0	31.6
44	0	1	2.2	0	1	1	0	0	89.2333
44	0	1	2.5	0	1	1	0	0	65.6667
44	0	2	1.7	0	1	1	0	0	65.2
44	1	2	4.5	1	1	1	0	0	22.3
44	0	2	2.5	0	1	1	0	0	51.4667
44	0	2	6.5	1	3	1	0	0	85.5667
44	0	2	3.5	0	1	1	0	0	44.4667
44	0			1	3	1	0	0	96.1
44	0	1	3.2	0	1	1	0	0	35.4
44	1	2	2.2	0	1	0	0	0	34.9333
44	0	1	3	0	1	1	0	0	34
44	0	2	3	1	1	1	0	0	18.1333
44	0	2	2.4	0	1	1	0	0	20.9333
44	0	1	0.5	1	1	1	0	0	20.3667
44	0	2	2.5	0	3	1	0	0	19.7333
44	0	1	1.5	0	1	1	0	0	21.9
44	0	1	1.5	0	1	1	0	1	96.9333
44	0	2	3.5	0	3	1	0	0	18.3
44	0	2	3.5	1	3	1	0	0	16.0667
44	0	2	1.5	0	3	1	0	0	14.6
44	0	1	2.6	0	1	1	0	0	22.1
44	0	2	3	0	1	1	0	0	20.6333
43	0	1	6	1	3	1	1	1	16.5667
43	0	1	2.5	0	1	1	0	0	110.8
43	1		1.5	0	1	1	0	0	14.8
43	0	1	1.4	1	3	1	0	1	55.6333
43	0	2	4.8	0	3	1	0	0	107.967
43	0			0	1	1	0	0	127.767
43	0	2	6.5	1	3	1	1	1	52.6333
43	1	2	2.5	0	3	1	0	0	114.533
43	0	1	0.9	0	1	1	0	0	109.767
43	0	1	1.1	0	1	1	0	0	94.9333
43	0	2	2.5	1	1	1	0	0	29.2667
43	0	2	2.8	0	3	1	0	0	92.5
43	0	1	2.8	0	1	1	0	0	89.2333
43	0	1	3.5	1	3	1	0	0	88.7667
43	1	2	6	1	3	1	1	1	42.4667
43	0	1	1.6	0	1	1	0	0	18.8333
43	0	1	1.8	0	3	1	0	0	67.3667
43	0	2	4	1	3	1	1	1	13.5667
43	0	2	2	0	3	1	0	0	62.9333
43	0	2	3	0	3	1	0	0	59.8
43	0	2	3	0	3	1	1	1	32.9667
43	0	1	3	0	1	1	0	0	53.0667
43	0	1	2	1	1	1	0	0	51.7
43	0	2	1.2	1	1	1	0	0	60.7333
43	0	2	5	0	1	1	0	0	88.1333
43	1	1	2.5	0	1	1	0	0	95.0667
43	0	1	3.2	0	1	1	0	0	37.5
43	0	2	3.5	0	1	1	0	0	36.0667
43	0	1	5.5	1	3	1	1	1	24.7667
43	0	1	3.2	0	1	1	0	0	34
43	1		6	0	1	1	0	0	113.467
43	0	2	2.2	0	3	1	0	0	23.2667
43	0	2	2.6	0	3	1	0	0	24.8667
43	0	2	3	0	1	1	0	0	22.2667
43	0	1	3.2	1	1	1	0	0	132.967
43	1	2	1.4	0	1	1	0	0	21.1
43	0	2	1.2	1	1	1	0	0	60.7333
43	0	1	2.5	1	1	1	0	0	87.3333
43	1	1	1.8	0	1	1	0	0	18.5667
43	0	1	1	0	1	1	0	0	33.1667
43	0	2	1.5	0	3	1	0	0	15.7
43	0	1	2.5	0	1	1	0	0	87.2333
43	0	2	6	1	3	1	0	0	13.7333
43	0	2	3.5	0	3	1	0	0	12.9667
43	0	1	1	1	1	1	0	0	45.6333
42	0	1	3	0	3	1	0	0	135.967
42	0	2	3	1	1	1	0	0	128.667
42	0	1	2.5	0	1	1	0	0	126.933
42	0			0	1	1	0	0	127.767
42	0	2	2	1	1	1	0	0	52.8667
42	0	1	1.8	0	3	1	0	0	105.533
42	0	2	3	0	1	1	0	0	51.5
42	0	2	4	0	1	1	0	0	92.3
42	0	1	0.8	1	3	0	0	0	91.8667
42	0	1	1.8	0	3	0	0	0	91.3667
42	0	2	2	0	1	1	0	0	65.2
42	0	2	2.9	1	1	1	0	0	14.8667
42	0	1	1.8	0	3	1	0	0	62.4333
42	0	2	2	0	1	1	0	0	55.2333
42	0	2	3	0	1	1	0	0	51.5
42	0	2	3.2	0	3	1	0	0	50.6
42	0	2	4.8	0	1	1	0	0	88.1333
42	0	2	1.6	0	1	1	0	0	19.2667
42	0	2	2.8	1	1	1	0	0	18.1333
42	0	1	1	0	1	1	0	0	116.567
42	0	2	1.5	0	1	1	0	0	24.6
42	0	1	6	1	1	1	1	1	30.0667
42	0	2	1.5	0	1	1	0	0	22.0333
42	0	2	1.5	0	3	1	0	0	51.5333
42	0	2	1.5	0	3	1	0	0	17.3667
42	0	1	1.2	0	3	1	0	0	17.6333
42	0	2	4	1	3	1	0	0	16.0667
42	0	1	4.2	1	1	1	0	0	14.6
42	0	2	4.2	0	3	1	0	0	12.9667
42	0	1	1.5	1	1	1	0	0	109.133
42	0	2	2.8	0	1	1	0	0	20.6333
41	1		1.2	1	1	1	0	0	133.9
41	0	2	3.5	1	1	1	0	0	31.3667
41	0	2	3.6	0	1	1	0	0	14.6
41	0	2	5	0	3	1	0	0	107.967
41	0		4	1	3	1	1	1	34.6667
41	0	2	2	1	1	1	0	0	120.967
41	0		1.9	1	1	1	0	0	135.733
41	0	2	8	1	3	1	1	1	52.6333
41	0	1	2	1	1	1	0	0	111.867
41	0	2	3	1	1	1	0	0	29.2667
41	0	1	2	1	1	1	1	1	61.0333
41	0	2	2.5	1	1	1	0	0	14.8667
41	0	1	1.5	0	1	1	0	0	81
41	0	1	4.5	0	1	1	0	0	134.767
41	0	2	3	0	1	1	0	0	51.4667
41	0	1	2.3	0	1	1	0	0	88.5667
41	0	1	3	0	3	1	0	0	36.1
41	0	1	4	0	3	1	0	1	36.2667
41	0	2	3	1	3	1	0	0	30.9667
41	0	2	4	1	3	1	0	0	48.9667
41	0	1	3.2	1	1	1	0	0	50.1333
41	0	2	2.7	0	1	1	0	0	22.2667
41	0	2	1.2	0	1	1	0	0	22.0333
41	0	2	1.8	0	1	1	0	0	20.4667
41	0	1	3	1	1	1	0	0	40
41	0	2	2.8	0	3	0	0	0	19.2
41	0	2	4	0	3	1	0	0	18.3
41	0	2	3.1	1	3	1	0	0	62.4667
41	0	1	3	1	1	1	0	0	65.4333
41	0	2	1.8	0	3	1	0	0	17.3667
41	0	1	1	0	3	1	0	0	17.6333
41	0	2	2	0	3	1	0	0	15.7
41	0	1	3	0	1	1	0	0	87.2333
41	0	2	5.3	1	3	1	0	0	13.7333
41	0	1	2.3	0	1	1	0	0	22.1
41	0	1	1.5	0	1	1	0	0	118.667
40	0	1	1.9	1	1	1	0	0	136
40	0	1	3.4	0	1	1	0	0	120.8
40	0	2	3	1	1	1	0	0	60.5
40	0	2	3.5	1	1	1	0	0	48.4
40	0	2	2	0	1	1	0	0	19.2667
40	0	2	3.5	1	3	1	0	0	30.9667
40	0	2	2.5	1	1	1	0	0	60.5667
40	0	1	3	1	1	1	0	0	50.1333
40	0	1	8	1	1	1	1	1	30.0667
40	0	1	4	1	1	1	0	0	132.967
40	0	2	3.8	0	1	1	0	0	21.7667
40	0	2	2	0	1	1	0	0	19.7333
40	0	1	2	1	1	1	1	1	37.7333
40	0	1	4	0	1	1	0	0	135.633
40	0	1	1.7	1	1	1	0	0	109.133
39	0	1	4	1	1	1	0	0	134.5
39	0	2	2.5	0	3	1	0	0	124.8
39	0	2	1.8	0	3	1	0	0	123.633
39	0	1	2	1	1	1	0	0	77.3333
39	0	2	2.3	0	1	1	0	0	23.2667
39	0	2	2.9	1	1	1	0	0	60.5
39	0	2	1.5	1	1	1	0	0	50.5667
39	1	2	1.8	1	3	0	0	0	94.4
39	1	2	5.5	1	3	1	1	1	42.4667
39	0	2	4	1	3	1	1	1	40.3667
39	0	2	3.5	1	3	1	0	0	55.7333
39	0	1	4.3	0	1	1	0	0	53.0667
39	0	1	4.8	0	1	1	0	0	134.767
39	0	2	1.5	1	1	1	0	0	50.5667
39	0	2	4	1	1	1	0	0	48.4
39	0	2	3	0	3	1	0	1	44.4
39	0	2	1.7	0	1	1	0	0	24.6
39	0	2	2	0	1	1	0	0	20.4667
39	0	2	1.5	0	1	1	0	0	19.7333
39	0	2	1.2	0	3	1	0	0	51.5333
39	0	2	2	0	3	1	0	0	17.9333
39	0	2	3	1	3	1	0	0	62.4667
39	0	1	3.3	1	3	1	0	0	14.6
39	0	2	5	0	3	1	0	0	133.9
39	0	1	2	1	1	1	0	0	45.6333
38	0	1	4	0	1	1	0	0	19.5333
38	0	1	3	1	1	1	1	1	60
38	0	1	1.7	1	1	1	0	0	111.867
38	0	1	1.3	1	1	1	0	0	94.4667
38	0	2	3.8	1	3	1	0	0	55.7333
38	0	1	3	0	3	1	0	0	131.1
38	0	1	2.8	0	1	1	0	0	88.5667
38	0	2	3.5	1	1	1	1	1	18.7667
38	0	1	3	0	3	1	0	0	43.3
38	0	2	2	1	1	1	0	0	42.3
38	0	2	2.3	1	1	1	0	0	60.5667
38	0	2	2.5	0	1	1	0	0	28.9
38	0	2	4.5	1	3	1	0	0	48.9667
38	0	2	1.8	0	1	1	0	0	19.0667
38	0	1	3.4	1	1	1	0	0	40
38	0	2	3	0	3	0	0	0	19.2
38	0	2	1.8	1	1	1	0	0	19
38	0	1	1.5	1	1	1	1	1	37.7333
38	0	2	2.5	0	3	1	0	0	118.4
38	0	2	4	0	3	1	0	0	133.9
37	0	1	2.5	1	3	1	1	1	42.6
37	0	1	2.5	1	1	1	0	0	127.333
37	0	2	1.5	0	3	1	0	0	123.633
37	0	1	1.5	1	1	1	0	0	77.3333
37	0	2	1.8	1	1	1	0	0	120.967
37	0	1	3.2	0	1	1	0	0	120.8
37	0	2	1.7	0	1	1	0	0	104.833
37	0	2	4.2	1	1	0	0	0	60
37	0	1	1.9	0	3	0	0	0	91.3667
37	0	2	2	0	1	1	0	0	76.7333
37	0	2	3.2	1	1	1	0	0	65
37	0	1	1.3	0	1	1	0	0	81
37	0	2	2	0	1	1	0	0	58.0667
37	0	1	3.2	0	3	1	0	0	131.1
37	0	2	1.5	1	1	1	0	0	54.5333
37	0	2	4	0	3	1	0	0	44.5
37	0	1	3.8	0	3	1	0	1	36.2667
37	0	1	3.5	1	1	1	0	0	109.7
37	0	2	4	0	1	1	0	0	21.7667
37	0	2	1.1	0	3	1	0	0	17.9333
37	0	2	2.2	0	3	1	0	0	53.3
37	0	1	4	0	1	1	0	0	135.633
37	0	1	2	1	1	1	0	0	13.6667
36	0	2	1.8	0	1	1	0	0	62.8333
36	0	2	4	0	1	1	0	0	14.6
36	0	1	1.5	1	1	1	0	0	94.4667
36	0	1	2	1	1	1	1	1	61.0333
36	0	2	1.8	0	1	1	0	0	93.2
36	0	2	3.8	1	1	1	1	1	18.7667
36	0	1	3.3	0	3	1	0	0	43.3
36	0	2	1.7	1	1	1	0	0	42.3
36	0	1	0.5	1	1	1	0	0	38.8667
36	0	1	7	1	3	1	1	1	35
36	0	2	3	0	1	1	0	0	28.9
36	0	2	1.2	0	1	1	0	0	19.0667
36	0	1	2.8	1	1	1	0	0	65.4333
36	0	2	2.8	0	3	1	0	0	118.4
35	0	2	1.5	1	1	1	0	0	115
35	0	1	3.2	1	1	1	1	1	60
35	0	2	1.9	0	1	1	0	0	58.0667
35	0	2	3.2	0	3	1	0	0	44.5
35	0	2	2.7	0	3	1	0	1	44.4
35	0	1	4	1	1	1	0	0	109.7
35	0	2	2	1	1	1	0	0	19
35	0	2	3	0	3	1	0	0	31
35	0	2	1.3	0	1	1	0	0	17.6667
35	0	2	2.7	0	1	1	0	0	25.1
35	0	2	2.3	0	3	1	0	0	53.3
35	0	1	1.6	1	1	1	0	0	13.6667
35	0	2	3.2	0	3	1	0	0	13.5
35	0	1	3	0	1	1	0	0	131.733
34	0	2	4.8	0	1	1	0	0	132.833
34	0	2	1.8	1	1	1	0	0	115
34	0	2	2.5	0	1	1	0	0	23.2667
34	0	2	2	0	1	1	0	0	104.833
34	0	2	1.8	1	1	1	0	0	98.8
34	0	2	1.2	1	1	1	0	0	54.5333
34	0	1	2.5	1	1	1	0	1	52.6667
34	0	2	2	0	1	1	0	0	93.2
34	0	2	1	0	1	1	0	0	44.5
34	0	1	0.8	1	1	1	0	0	38.8667
34	0	1	9	1	3	1	1	1	35
34	0	2	4	1	1	1	0	0	19.2333
34	0	2	2.7	1	1	1	0	0	17.7333
34	0	2	3.5	0	3	1	0	0	13.8667
33	0	1	2	1	1	1	0	0	136
33	0	2	4.5	1	1	0	0	0	60
33	0	1	2.4	0	1	1	0	0	97.9
33	0	2	1.8	0	1	1	0	0	76.7333
33	0	2	2.5	0	1	1	0	0	26.6333
33	0	2	1.2	0	1	1	0	0	17.6667
33	0	2	3.3	1	1	1	0	0	17.7333
33	0	2	3	0	1	1	0	0	25.1
33	0	2	3	0	1	1	0	0	13.7333
33	0	1	2.7	0	1	1	0	0	131.733
32	0	2	1.7	0	1	1	0	0	62.8333
32	0	2	1.8	1	1	1	0	0	24.3333
32	0	2	2.3	0	3	1	0	0	13.8667
31	0	1	3	1	1	1	0	0	127.333
31	0	2	2	1	1	1	0	0	98.8
31	0	2	4.5	1	3	1	0	0	50.5
31	0			1	1	1	0	0	101.433
31	0	1	2.8	0	1	1	0	0	137.167
31	0	2	1.7	1	1	1	0	0	20.7
31	0	2	2.5	0	3	1	0	0	31
30	0	2		0	1	1	0	1	12.9333
30	0	1	2.5	0	1	1	0	0	97.9
30	0	1	2.2	1	1	1	0	1	52.6667
30	0	2	3	0	1	1	0	0	26.6333
30	0	2	2	1	1	1	0	0	24.3333
30	0	2	1.9	1	1	1	0	0	20.7
30	0	2	2.5	0	3	1	0	0	13.5
29	0	2	5	0	1	1	0	0	132.833
29	0	2	4	1	3	1	0	0	50.5
29	0	2	3	1	1	1	0	0	19.2333
29	0	2	3.1	0	1	1	0	0	13.7333
28	0			1	1	1	0	0	101.433
28	0	1	2.5	0	1	1	0	0	137.167
25	0	1	1.5	0	1	1	0	0	118.4
24	0	2		0	1	1	0	1	12.9333
23	0	1	2	0	1	1	0	0	118.4
